# Supplementary material for: Relationship between serum indirect bilirubin levels and skeletal muscle mass in older male and female patients with type 2 diabetes
Source: PubMed Central journal article supplement (PMC9629548; doi:10.1371/journal.pone.0276976), 2022-11-02
Supplement: pone.0276976.s001.pdf [file pone.0276976.s001.pdf]

| Patient No. | Age | Sex (male 0) | HbA1c | T-bilirubin | ID-bilirubin | Total protein |
|-------------|-----|--------------|-------|-------------|--------------|---------------|
| 1           | 60  | 0            | 9.5   | 0.7         | 0.5          | 7.1           |
| 2           | 60  | 0            | 5.9   | 1.1         | 0.8          | 6.9           |
| 3           | 60  | 0            | 6.9   | 0.6         | 0.4          | 7.4           |
| 4           | 60  | 0            | 5.4   | 0.6         | 0.4          | 7.1           |
| 5           | 60  | 1            | 7.3   | 1.2         | 0.9          | 6.7           |
| 6           | 61  | 0            | 6.9   | 0.7         | 0.4          | 7.3           |
| 7           | 61  | 0            | 7.3   | 0.3         | 0.2          | 7.2           |
| 8           | 61  | 1            | 7.5   | 0.7         | 0.5          | 7.6           |
| 9           | 61  | 1            | 6.1   | 0.6         | 0.5          | 6.8           |
| 10          | 62  | 0            | 6     | 1.8         | 1.2          | 6.4           |
| 11          | 62  | 0            | 7.6   | 0.5         | 0.3          | 6.8           |
| 12          | 62  | 0            | 6.5   | 1.3         | 0.9          | 7.3           |
| 13          | 62  | 0            | 7.6   | 0.4         | 0.3          | 5.8           |
| 14          | 62  | 0            | 6.5   | 1.6         | 1.2          | 7.7           |
| 15          | 62  | 0            | 6.7   | 0.8         | 0.6          | 7.3           |
| 16          | 62  | 0            | 6.6   | 0.8         | 0.6          | 7.4           |
| 17          | 62  | 1            | 6.2   | 0.8         | 0.5          | 8.2           |
| 18          | 62  | 1            | 5.7   | 0.6         | 0.4          | 7.3           |
| 19          | 62  | 1            | 6.6   | 0.9         | 0.7          | 7.6           |
| 20          | 62  | 1            | 8     | 0.5         | 0.4          | 8.3           |
| 21          | 62  | 1            | 6.6   | 0.7         | 0.5          | 7.6           |
| 22          | 63  | 0            | 6.1   | 0.7         | 0.5          | 7.6           |
| 23          | 63  | 0            | 6.4   | 1.3         | 0.9          | 7.4           |
| 24          | 63  | 0            | 8.3   | 0.7         | 0.4          | 7             |
| 25          | 63  | 0            | 7.8   | 1.1         | 0.9          | 7.6           |
| 26          | 63  | 0            | 6.2   | 0.7         | 0.5          | 6.9           |
| 27          | 63  | 0            | 7.1   | 0.4         | 0.2          | 7.4           |
| 28          | 63  | 1            | 7     | 0.3         | 0.2          | 7.5           |
| 29          | 63  | 1            | 7.1   | 0.4         | 0.3          | 7.5           |
| 30          | 63  | 1            | 7.4   | 0.7         | 0.5          | 6.8           |
| 31          | 63  | 1            | 8.2   | 0.4         | 0.3          | 7.2           |
| 32          | 64  | 0            | 7.1   | 0.6         | 0.4          | 7.6           |
| 33          | 64  | 0            | 7.2   | 0.8         | 0.5          | 7.4           |
| 34          | 64  | 0            | 8     | 1           | 0.7          | 7.6           |
| 35          | 64  | 0            | 6.6   | 0.3         | 0.2          | 7.7           |
| 36          | 64  | 0            | 7.2   | 0.6         | 0.4          | 6.6           |
| 37          | 64  | 1            | 7     | 0.8         | 0.6          | 7.9           |
| 38          | 64  | 1            | 6.4   | 0.4         | 0.3          | 7.3           |

|    |    |   |     |       |     |     |
|----|----|---|-----|-------|-----|-----|
| 39 | 64 | 1 | 6.9 | 0.8   | 0.5 | 6.9 |
| 40 | 64 | 1 | 6.3 | 1.1 - |     | 6.5 |
| 41 | 64 | 1 | 8.4 | 0.9   | 0.6 | 7.6 |
| 42 | 65 | 0 | 8.8 | 0.4   | 0.3 | 7.7 |
| 43 | 65 | 0 | 7.9 | 0.4   | 0.3 | 7.5 |
| 44 | 65 | 0 | 6.6 | 0.9   | 0.7 | 7   |
| 45 | 65 | 0 | 6.5 | 0.5   | 0.3 | 7.1 |
| 46 | 65 | 1 | 6.7 | 0.5   | 0.4 | 7.3 |
| 47 | 65 | 1 | 8.7 | 0.3   | 0.2 | 7.1 |
| 48 | 66 | 0 | 7.4 | 0.4   | 0.3 | 7.5 |
| 49 | 66 | 0 | 7.5 | 0.4   | 0.3 | 7.3 |
| 50 | 66 | 0 | 6.3 | 0.5   | 0.3 | 7.6 |
| 51 | 66 | 0 | 7.3 | 1.1   | 0.7 | 7.5 |
| 52 | 66 | 0 | 7.2 | 0.6   | 0.4 | 7.7 |
| 53 | 66 | 0 | 6   | 0.8   | 0.6 | 6.8 |
| 54 | 66 | 0 | 6.3 | 0.2   | 0.1 | 7.6 |
| 55 | 66 | 0 | 7.5 | 0.3   | 0.2 | 7.2 |
| 56 | 66 | 0 | 6.3 | 0.5   | 0.3 | 6.9 |
| 57 | 66 | 0 | 7   | 0.6   | 0.4 | 6.6 |
| 58 | 66 | 1 | 6   | 0.3   | 0.2 | 6.8 |
| 59 | 66 | 1 | 7.5 | 1     | 0.7 | 8.1 |
| 60 | 66 | 1 | 6.9 | 0.5 - |     | 8   |
| 61 | 66 | 1 | 7.7 | 0.5   | 0.4 | 6.7 |
| 62 | 66 | 1 | 7.2 | 2.8 - |     | 6.7 |
| 63 | 66 | 1 | 6.6 | 0.6   | 0.5 | 7.3 |
| 64 | 66 | 1 | 7.6 | 0.3   | 0.2 | 7.7 |
| 65 | 67 | 0 | 6.9 | 0.5   | 0.3 | 7.4 |
| 66 | 67 | 0 | 6   | 0.9   | 0.6 | 7.1 |
| 67 | 67 | 0 | 8.3 | 0.8   | 0.5 | 6.5 |
| 68 | 67 | 0 | 8.9 | 0.7   | 0.4 | 8   |
| 69 | 67 | 1 | 7.7 | 0.8   | 0.6 | 7.7 |
| 70 | 67 | 1 | 7.8 | 0.4   | 0.3 | 7.2 |
| 71 | 67 | 1 | 6.7 | 0.3   | 0.2 | 7.7 |
| 72 | 67 | 1 | 8.3 | 0.9   | 0.6 | 7.2 |
| 73 | 68 | 0 | 8.4 | 0.4   | 0.3 | 7.4 |
| 74 | 68 | 0 | 7.2 | 1     | 0.7 | 6.6 |
| 75 | 68 | 0 | 6.7 | 0.7   | 0.5 | 7.1 |
| 76 | 68 | 0 | 8.6 | 0.6   | 0.4 | 6.9 |
| 77 | 68 | 0 | 7.3 | 1.3   | 0.9 | 7.2 |

|     |    |   |     |       |     |     |
|-----|----|---|-----|-------|-----|-----|
| 78  | 68 | 0 | 8   | 0.5   | 0.4 | 7.1 |
| 79  | 68 | 0 | 7.9 | 0.8   | 0.5 | 6.6 |
| 80  | 68 | 0 | 6.8 | 0.4   | 0.2 | 6.9 |
| 81  | 68 | 1 | 7   | 0.4   | 0.3 | 6.4 |
| 82  | 68 | 1 | 6.5 | 0.5   | 0.4 | 7.2 |
| 83  | 68 | 1 | 6.5 | 0.6   | 0.4 | 7.3 |
| 84  | 68 | 1 | 5.9 | 0.4   | 0.3 | 6.9 |
| 85  | 68 | 1 | 8.2 | 0.8   | 0.5 | 7.5 |
| 86  | 68 | 1 | 5.8 | 0.7   | 0.5 | 7.1 |
| 87  | 69 | 0 | 7.3 | 0.5   | 0.4 | 6   |
| 88  | 69 | 0 | 7.7 | 0.6   | 0.5 | 7.8 |
| 89  | 69 | 0 | 7   | 1     | 0.7 | 7.1 |
| 90  | 69 | 0 | 7.6 | 0.5   | 0.3 | 7.1 |
| 91  | 69 | 0 | 7.4 | 0.9   | 0.6 | 7.5 |
| 92  | 69 | 0 | 4.7 | 0.9   | 0.6 | 7   |
| 93  | 69 | 0 | 7   | 0.7   | 0.4 | 6.7 |
| 94  | 69 | 1 | 7   | 0.5 - |     | 6.8 |
| 95  | 69 | 1 | 7.6 | 0.5   | 0.4 | 8.2 |
| 96  | 69 | 1 | 7.9 | 0.4 - |     | 6.8 |
| 97  | 69 | 1 | 7.3 | 0.7   | 0.5 | 7.3 |
| 98  | 69 | 1 | 7.5 | 0.6   | 0.5 | 6.5 |
| 99  | 70 | 0 | 6.9 | 0.8   | 0.6 | 6.7 |
| 100 | 70 | 0 | 7.8 | 0.6   | 0.4 | 7.4 |
| 101 | 70 | 0 | 7.1 | 0.8   | 0.5 | 7.1 |
| 102 | 70 | 0 | 6.6 | 0.9   | 0.6 | 7.1 |
| 103 | 70 | 1 | 6.8 | 0.5   | 0.4 | 7.3 |
| 104 | 70 | 1 | 7   | 0.5   | 0.4 | 7.2 |
| 105 | 70 | 1 | 11  | 0.4   | 0.3 | 6.7 |
| 106 | 71 | 0 | 6.3 | 1.5   | 1.1 | 7.1 |
| 107 | 71 | 0 | 8   | 0.3   | 0.2 | 7.2 |
| 108 | 71 | 0 | 6.4 | 0.4   | 0.3 | 7   |
| 109 | 71 | 0 | 6.9 | 0.4   | 0.3 | 7.2 |
| 110 | 71 | 0 | 8.2 | 0.8   | 0.5 | 8.3 |
| 111 | 71 | 0 | 6.2 | 1.1 - |     | 7.2 |
| 112 | 71 | 0 | 7.1 | 1     | 0.7 | 7.5 |
| 113 | 71 | 1 | 6.3 | 0.5   | 0.3 | 7.5 |
| 114 | 71 | 1 | 7.2 | 0.2   | 0.1 | 7.3 |
| 115 | 71 | 1 | 7.1 | 0.5   | 0.4 | 8.4 |
| 116 | 71 | 1 | 6.9 | 0.5   | 0.4 | 6.8 |

|     |    |   |     |     |     |     |
|-----|----|---|-----|-----|-----|-----|
| 117 | 71 | 1 | 7   | 0.9 | 0.6 | 7.4 |
| 118 | 71 | 1 | 6.5 | 0.7 | 0.5 | 7.2 |
| 119 | 71 | 1 | 8   | 0.7 | 0.5 | 6.8 |
| 120 | 72 | 0 | 7.8 | 0.5 | 0.3 | 7.4 |
| 121 | 72 | 0 | 8.5 | 0.6 | 0.4 | 6.7 |
| 122 | 72 | 0 | 7.5 | 0.5 | 0.3 | 7   |
| 123 | 72 | 0 | 6.6 | 0.5 | 0.3 | 7.3 |
| 124 | 72 | 0 | 6   | 0.4 | 0.3 | 7.2 |
| 125 | 72 | 0 | 6.8 | 0.6 | 0.4 | 7.5 |
| 126 | 72 | 0 | 7.5 | 0.6 | 0.4 | 7   |
| 127 | 72 | 0 | 6.4 | 1.5 | 1.1 | 7.9 |
| 128 | 72 | 0 | 6.9 | 0.6 | 0.4 | 7.4 |
| 129 | 72 | 0 | 7.5 | 0.7 | 0.5 | 7.4 |
| 130 | 72 | 0 | 7.3 | 0.4 | 0.3 | 7.9 |
| 131 | 72 | 1 | 6.4 | 0.4 | 0.3 | 6.8 |
| 132 | 72 | 1 | 7.7 | 0.4 | 0.3 | 7.4 |
| 133 | 72 | 1 | 6.9 | 0.4 | 0.3 | 6.7 |
| 134 | 72 | 1 | 6   | 0.4 | 0.3 | 7.3 |
| 135 | 72 | 1 | 7.8 | 0.7 | 0.5 | 7.6 |
| 136 | 72 | 1 | 7.8 | 0.2 | 0.1 | 7.7 |
| 137 | 72 | 1 | 6.4 | 0.7 | 0.5 | 6.9 |
| 138 | 73 | 0 | 8.4 | 0.6 | 0.4 | 7.5 |
| 139 | 73 | 0 | 6.8 | 1   | 0.7 | 6.7 |
| 140 | 73 | 0 | 6.4 | 0.6 | 0.4 | 6.3 |
| 141 | 73 | 0 | 7.2 | 0.6 | 0.4 | 7.8 |
| 142 | 73 | 1 | 5.6 | 0.7 | 0.5 | 6.6 |
| 143 | 73 | 1 | 6.7 | 0.3 | 0.2 | 8.3 |
| 144 | 74 | 0 | 6.6 | 0.6 | 0.4 | 6.6 |
| 145 | 74 | 0 | 6.8 | 0.7 | 0.5 | 7.6 |
| 146 | 74 | 0 | 6.5 | 0.8 | 0.5 | 7.7 |
| 147 | 74 | 0 | 6.3 | 1.2 | 0.8 | 6.8 |
| 148 | 74 | 0 | 7   | 0.5 | 0.3 | 7.5 |
| 149 | 74 | 0 | 6.8 | 0.4 | 0.3 | 6.3 |
| 150 | 74 | 0 | 6.2 | 0.7 | 0.5 | 6.7 |
| 151 | 74 | 1 | 6.7 | 0.2 | 0.1 | 6.9 |
| 152 | 74 | 1 | 7.1 | 0.7 | 0.5 | 6.6 |
| 153 | 74 | 1 | 6.6 | 0.4 | 0.3 | 7.2 |
| 154 | 74 | 1 | 6.8 | 0.3 | 0.3 | 6.9 |
| 155 | 74 | 1 | 6.6 | 0.6 | 0.4 | 7.3 |

|     |    |   |     |       |     |     |
|-----|----|---|-----|-------|-----|-----|
| 156 | 74 | 1 | 7.5 | 0.7   | 0.5 | 7.3 |
| 157 | 75 | 0 | 7.6 | 1     | 0.6 | 7   |
| 158 | 75 | 0 | 7.7 | 0.6   | 0.4 | 7.5 |
| 159 | 75 | 0 | 6.4 | 0.6   | 0.4 | 6.9 |
| 160 | 75 | 0 | 6.4 | 0.6   | 0.4 | 6.6 |
| 161 | 75 | 0 | 7.6 | 0.5   | 0.3 | 7.9 |
| 162 | 75 | 0 | 5.9 | 0.5   | 0.3 | 7.5 |
| 163 | 75 | 1 | 5.7 | 0.5   | 0.4 | 7.4 |
| 164 | 75 | 1 | 7.3 | 0.4   | 0.3 | 6.8 |
| 165 | 75 | 1 | 6.7 | 0.3   | 0.2 | 6.7 |
| 166 | 76 | 0 | 6.3 | 0.5 - |     | 7.3 |
| 167 | 76 | 0 | 6.3 | 0.7   | 0.5 | 6.8 |
| 168 | 76 | 0 | 7.6 | 0.5   | 0.4 | 7.6 |
| 169 | 76 | 0 | 6.7 | 0.6   | 0.4 | 7.1 |
| 170 | 76 | 0 | 6.6 | 0.5   | 0.3 | 7   |
| 171 | 76 | 0 | 6.6 | 0.6   | 0.4 | 6.8 |
| 172 | 76 | 1 | 7   | 0.9   | 0.7 | 7.6 |
| 173 | 76 | 1 | 6.9 | 0.5 - |     | 6.4 |
| 174 | 76 | 1 | 6.7 | 0.5   | 0.3 | 7.3 |
| 175 | 76 | 1 | 7.8 | 0.4   | 0.2 | 7.8 |
| 176 | 76 | 1 | 7.5 | 0.7   | 0.5 | 8.1 |
| 177 | 76 | 1 | 8   | 0.4 - |     | 7.3 |
| 178 | 77 | 0 | 7.5 | 0.5   | 0.3 | 7.5 |
| 179 | 77 | 0 | 7.2 | 0.4   | 0.3 | 6.9 |
| 180 | 77 | 0 | 6.5 | 0.8   | 0.5 | 7.8 |
| 181 | 77 | 0 | 5.6 | 0.7   | 0.5 | 6.5 |
| 182 | 77 | 0 | 7.1 | 0.8   | 0.6 | 6.2 |
| 183 | 77 | 0 | 6.1 | 0.5   | 0.4 | 7.1 |
| 184 | 77 | 0 | 6.7 | 0.6   | 0.4 | 6.9 |
| 185 | 77 | 0 | 5.8 | 1     | 0.5 | 7.2 |
| 186 | 77 | 0 | 6.4 | 0.6   | 0.3 | 7.2 |
| 187 | 77 | 0 | 7.2 | 0.4   | 0.3 | 6.9 |
| 188 | 77 | 0 | 6.5 | 0.9   | 0.6 | 7.7 |
| 189 | 77 | 1 | 7.2 | 0.3   | 0.2 | 6.7 |
| 190 | 78 | 0 | 6.5 | 0.9   | 0.7 | 7.3 |
| 191 | 78 | 0 | 8.7 | 0.5   | 0.3 | 7.4 |
| 192 | 78 | 0 | 6.8 | 0.5   | 0.4 | 7.3 |
| 193 | 78 | 0 | 6.4 | 1.8   | 1.3 | 6.9 |
| 194 | 78 | 1 | 6.9 | 0.3   | 0.2 | 7.4 |

|     |    |   |      |       |     |     |
|-----|----|---|------|-------|-----|-----|
| 195 | 78 | 1 | 7.5  | 0.4   | 0.3 | 7.5 |
| 196 | 78 | 1 | 7.4  | 0.7   | 0.5 | 7.2 |
| 197 | 78 | 1 | 9.6  | 0.6   | 0.4 | 7.1 |
| 198 | 79 | 0 | 6.7  | 0.4   | 0.3 | 8.1 |
| 199 | 79 | 0 | 7.4  | 1.1   | 0.7 | 7.6 |
| 200 | 79 | 0 | 7.6  | 0.7   | 0.6 | 6.9 |
| 201 | 79 | 0 | 6.6  | 0.9   | 0.6 | 6.6 |
| 202 | 79 | 1 | 7.8  | 0.5 - |     | 7.3 |
| 203 | 79 | 1 | 6.6  | 0.4   | 0.3 | 7.6 |
| 204 | 80 | 0 | 7.3  | 0.3 - |     | 6.6 |
| 205 | 80 | 0 | 7.1  | 0.5   | 0.2 | 7.1 |
| 206 | 80 | 0 | 7.6  | 0.5   | 0.3 | 7.1 |
| 207 | 80 | 0 | 6.4  | 0.7   | 0.4 | 7.2 |
| 208 | 80 | 0 | 6.7  | 0.5   | 0.3 | 7.2 |
| 209 | 80 | 0 | 8.1  | 0.4   | 0.3 | 7.3 |
| 210 | 80 | 0 | 7.1  | 0.6   | 0.4 | 7.4 |
| 211 | 80 | 1 | 6.7  | 1.2   | 0.9 | 7.3 |
| 212 | 80 | 1 | 9.8  | 0.3 - |     | 6   |
| 213 | 80 | 1 | 7.5  | 0.2   | 0.1 | 7.5 |
| 214 | 80 | 1 | 8.8  | 0.6   | 0.4 | 7   |
| 215 | 81 | 0 | 8.3  | 0.4   | 0.2 | 6.8 |
| 216 | 81 | 1 | 8.4  | 0.7   | 0.5 | 7.4 |
| 217 | 81 | 1 | 8.7  | 0.4   | 0.3 | 7.1 |
| 218 | 81 | 1 | 7.3  | 0.5   | 0.3 | 6.8 |
| 219 | 81 | 1 | 6.2  | 0.6   | 0.5 | 7.1 |
| 220 | 82 | 0 | 6.3  | 0.9 - |     | 6.8 |
| 221 | 82 | 0 | 6    | 0.4 - |     | 7.2 |
| 222 | 82 | 0 | 7.5  | 0.6   | 0.4 | 7   |
| 223 | 82 | 0 | 6.8  | 0.5   | 0.3 | 7.9 |
| 224 | 82 | 0 | 12.6 | 0.7   | 0.4 | 7.6 |
| 225 | 82 | 1 | 9.7  | 0.5   | 0.3 | 7.3 |
| 226 | 82 | 1 | 7.2  | 0.3   | 0.2 | 7.5 |
| 227 | 82 | 1 | 8.2  | 0.5 - |     | 7.2 |
| 228 | 82 | 1 | 9.1  | 0.4   | 0.3 | 7.5 |
| 229 | 83 | 0 | 7.4  | 0.6   | 0.4 | 7.1 |
| 230 | 83 | 0 | 6    | 0.7   | 0.4 | 7.5 |
| 231 | 83 | 0 | 9    | 0.5   | 0.3 | 6.8 |
| 232 | 83 | 1 | 7.7  | 0.8 - |     | 7.2 |
| 233 | 83 | 1 | 6.1  | 0.5   | 0.3 | 6.5 |

|     |    |   |     |       |     |     |
|-----|----|---|-----|-------|-----|-----|
| 234 | 83 | 1 | 8.5 | 0.5   | 0.3 | 7.3 |
| 235 | 83 | 1 | 11  | 0.7   | 0.5 | 7.4 |
| 236 | 83 | 1 | 6.2 | 0.3   | 0.2 | 7.1 |
| 237 | 83 | 1 | 6.5 | 0.8   | 0.5 | 7.1 |
| 238 | 83 | 1 | 6.9 | 0.7   | 0.5 | 6.7 |
| 239 | 84 | 1 | 6.5 | 0.6   | 0.4 | 6.3 |
| 240 | 84 | 1 | 6.4 | 0.6   | 0.4 | 7.1 |
| 241 | 84 | 1 | 5.9 | 0.7   | 0.4 | 6.3 |
| 242 | 84 | 1 | 8.2 | 0.7   | 0.5 | 7.1 |
| 243 | 85 | 0 | 6.8 | 0.7 - |     | 6.8 |
| 244 | 85 | 0 | 8.3 | 0.4   | 0.2 | 6.7 |
| 245 | 85 | 0 | 8   | 0.4   | 0.3 | 7.1 |
| 246 | 85 | 0 | 7.4 | 0.8   | 0.6 | 7.5 |
| 247 | 85 | 0 | 6.4 | 0.6   | 0.3 | 5.1 |
| 248 | 85 | 0 | 8.6 | 0.5   | 0.3 | 7.3 |
| 249 | 85 | 0 | 7.1 | 0.5   | 0.3 | 7.1 |
| 250 | 86 | 0 | 8.1 | 0.6   | 0.3 | 6.5 |
| 251 | 86 | 0 | 5.7 | 0.4   | 0.2 | 7.4 |
| 252 | 86 | 0 | 8.5 | 1 -   |     | 7.7 |
| 253 | 86 | 0 | 5.7 | 0.3   | 0.2 | 6.6 |
| 254 | 86 | 1 | 7.1 | 0.5   | 0.3 | 6.7 |
| 255 | 87 | 0 | 6.7 | 0.4   | 0.3 | 7.8 |
| 256 | 87 | 1 | 9.7 | 0.3   | 0.2 | 7.6 |
| 257 | 87 | 1 | 6.1 | 0.3   | 0.2 | 6.5 |
| 258 | 88 | 1 | 6.9 | 0.7   | 0.5 | 7.2 |
| 259 | 88 | 1 | 8.3 | 0.4   | 0.3 | 7.8 |
| 260 | 88 | 1 | 7   | 0.5   | 0.4 | 8   |
| 261 | 89 | 1 | 8   | 0.7   | 0.6 | 6.8 |
| 262 | 90 | 1 | 7.3 | 0.6 - |     | 6.6 |
| 263 | 90 | 1 | 6.8 | 0.5   | 0.4 | 7.4 |
| 264 | 90 | 1 | 6.6 | 0.6   | 0.4 | 7.1 |
| 265 | 91 | 0 | 7.7 | 0.7 - |     | 7.4 |
| 266 | 91 | 1 | 7   | 0.4   | 0.3 | 6.1 |
| 267 | 91 | 1 | 7.7 | 0.4   | 0.3 | 7.2 |
| 268 | 91 | 1 | 7.1 | 0.6   | 0.4 | 7   |
| 269 | 92 | 1 | 6   | 0.5   | 0.3 | 7.3 |
| 270 | 93 | 0 | 7.2 | 0.7   | 0.4 | 8.4 |
| 271 | 93 | 1 | 6   | 0.3   | 0.2 | 6.6 |
| 272 | 95 | 0 | 7.2 | 0.4   | 0.3 | 6.8 |

| Albumin | Height | Weight | BMI      | Soft lean mass | Skeletal muscle mass |
|---------|--------|--------|----------|----------------|----------------------|
| 4.3     | 168.8  | 64     | 22.46131 | 44.6           | 25.6                 |
| 4.6     | 170    | 74.4   | 25.74394 | 50.2           | 29.4                 |
| 4.6     | 165.6  | 73.4   | 26.7655  | 51.6           | 30.6                 |
| 4.6     | 167.8  | 65     | 23.08498 | 50.5           | 29.8                 |
| 3.9     | 153.2  | 52.6   | 22.41136 | 33.3           | 18.8                 |
| 4.1     | 159.8  | 46.1   | 18.05292 | 36.2           | 20.4                 |
| 4.3     | 169    | 84.5   | 29.5858  | 52.4           | 30.5                 |
| 4.5     | 151.2  | 52     | 22.74572 | 31.9           | 17.8                 |
| 4.8     | 154.2  | 62.9   | 26.45342 | 41.1           | 23.9                 |
| 3.8     | 175.8  | 85.7   | 27.72957 | 57.7           | 33.3                 |
| 4.3     | 167.8  | 63     | 22.37467 | 49.4           | 28.9                 |
| 4.7     | 168.8  | 67.3   | 23.61947 | 48.4           | 28.3                 |
| 3.4     | 178.2  | 84.3   | 26.5468  | 55.8           | 31.9                 |
| 4.7     | 170.4  | 60.4   | 20.80165 | 43.3           | 25.2                 |
| 4.9     | 168    | 65.5   | 23.2072  | 45.9           | 26.9                 |
| 4.7     | 165.3  | 49.8   | 18.22568 | 35.4           | 19.8                 |
| 5       | 156.4  | 51.9   | 21.21748 | 36.5           | 20.9                 |
| 4.3     | 148    | 43.8   | 19.99635 | 28.7           | 15.6                 |
| 4.8     | 156.6  | 53.3   | 21.7342  | 34.8           | 19.4                 |
| 4.4     | 150.3  | 112.7  | 49.88913 | 48.9           | 28.2                 |
| 4.6     | 153.1  | 49     | 20.90478 | 34.1           | 18.9                 |
| 4.1     | 165.5  | 75     | 27.38201 | 50.5           | 29.7                 |
| 4.6     | 162    | 66.8   | 25.45344 | 47.4           | 27.8                 |
| 4.2     | 166.5  | 77.1   | 27.8116  | 54             | 32                   |
| 4.7     | 169.7  | 74.5   | 25.86977 | 47.8           | 27.6                 |
| 4.5     | 170.8  | 84.5   | 28.9655  | 52.8           | 30.9                 |
| 4.5     | 163.3  | 49.1   | 18.41235 | 39.4           | 22.8                 |
| 4.6     | 159.1  | 59     | 23.30836 | 36.1           | 20.1                 |
| 4.4     | 147.6  | 77.8   | 35.7114  | 40.3           | 23.1                 |
| 4.1     | 165.3  | 49.6   | 18.15248 | 39.3           | 22                   |
| 4.3     | 155.4  | 64.5   | 26.709   | 36.8           | 20.8                 |
| 4.6     | 167.6  | 60.6   | 21.5737  | 35.5           | 19.3                 |
| 4.9     | 152.5  | 61.2   | 26.31551 | 41.9           | 24.5                 |
| 4.6     | 156.5  | 61.1   | 24.94667 | 43.1           | 25.2                 |
| 4.7     | 171.7  | 93.4   | 31.68154 | 61             | 36.4                 |
| 4       | 158.5  | 60.2   | 23.96282 | 46.2           | 27                   |
| 4.6     | 147.6  | 59.4   | 27.26552 | 35.2           | 20.4                 |
| 4.6     | 149.7  | 50.5   | 22.53449 | 31             | 17.3                 |



|   |     |       |      |          |      |      |
|---|-----|-------|------|----------|------|------|
|   | 4.5 | 156.3 | 66.9 | 27.38471 | 40.1 | 23   |
| - |     | 149.4 | 59.4 | 26.61247 | 33.1 | 18.4 |
|   | 4.5 | 147.5 | 64   | 29.41683 | 35.2 | 19.8 |
|   | 4.8 | 169.2 | 74.6 | 26.05782 | 48   | 28.1 |
|   | 4.4 | 170.5 | 68.7 | 23.63241 | 50.1 | 29.2 |
|   | 4.2 | 169.9 | 63.4 | 21.96355 | 45.6 | 26.4 |
|   | 4.5 | 177.9 | 78.9 | 24.93016 | 59.8 | 35.5 |
|   | 4.7 | 140.1 | 38.8 | 19.76767 | 26.4 | 14.5 |
|   | 4.6 | 152   | 55.3 | 23.93525 | 34.7 | 19.8 |
|   | 4.3 | 164.9 | 75.9 | 27.91261 | 46.8 | 26.8 |
|   | 4.3 | 168.3 | 66.5 | 23.47758 | 45.3 | 26.3 |
|   | 4.6 | 173.6 | 91.6 | 30.39457 | 55.5 | 33   |
|   | 4.6 | 171.5 | 73.4 | 24.95559 | 51.7 | 30.2 |
|   | 4.6 | 159.9 | 54   | 21.12014 | 36   | 20.3 |
|   | 4.4 | 160.1 | 60.7 | 23.68133 | 45.7 | 26.7 |
|   | 4.3 | 166   | 58.2 | 21.12063 | 44.1 | 25.5 |
|   | 3.9 | 160.3 | 76.1 | 29.6154  | 48.2 | 27.8 |
|   | 4.1 | 161.8 | 62.7 | 23.95028 | 38.9 | 21.7 |
|   | 4.1 | 158.1 | 56.2 | 22.48395 | 40.5 | 23.5 |
|   | 4   | 151.3 | 74   | 32.32614 | 38.9 | 22   |
|   | 4.5 | 146.8 | 53.5 | 24.82571 | 30.4 | 16.9 |
| - |     | 149.6 | 42.7 | 19.0794  | 28.4 | 15.5 |
|   | 4.4 | 162.5 | 62.3 | 23.5929  | 41.5 | 24.2 |
|   | 4.4 | 147.7 | 47.5 | 21.77372 | 30.1 | 16.8 |
|   | 4.5 | 152.2 | 64.1 | 27.67125 | 35.5 | 20.2 |
|   | 4.7 | 153.8 | 62.3 | 26.33755 | 36   | 20.4 |
|   | 4.4 | 164.8 | 56   | 20.61929 | 43.5 | 25.2 |
|   | 4.6 | 171.2 | 68   | 23.20072 | 47.1 | 27.3 |
|   | 4.3 | 149   | 42.4 | 19.09824 | 34.2 | 19.3 |
|   | 4.8 | 162.7 | 78.5 | 29.65477 | 48.8 | 28.8 |
|   | 4.5 | 154.8 | 50   | 20.86547 | 33.2 | 18.6 |
|   | 4.4 | 156.4 | 65   | 26.57296 | 36.1 | 20.1 |
|   | 4.6 | 152.7 | 59.4 | 25.47466 | 32.7 | 18.3 |
|   | 4.6 | 151.1 | 50   | 21.89985 | 31.3 | 17.3 |
|   | 4.5 | 161.1 | 54.9 | 21.15345 | 38.9 | 22.4 |
|   | 4.1 | 167   | 66.7 | 23.91624 | 43.3 | 25   |
|   | 4.3 | 175.6 | 82.8 | 26.85229 | 46.8 | 26.8 |
|   | 4.1 | 166.4 | 54.5 | 19.68294 | 43.8 | 25.6 |
|   | 4.6 | 171.4 | 80.8 | 27.50361 | 53.8 | 31.7 |

|     |       |      |          |      |      |
|-----|-------|------|----------|------|------|
| 4.4 | 171.7 | 78.6 | 26.66134 | 53.5 | 31.1 |
| 4.2 | 159   | 59.3 | 23.45635 | 43.8 | 25.5 |
| 4.5 | 157.6 | 62.3 | 25.08278 | 47.9 | 27.8 |
| 4.1 | 153.6 | 48.3 | 20.47221 | 32.3 | 18   |
| 4.3 | 162.6 | 89.8 | 33.96528 | 42.5 | 24.1 |
| 4.4 | 154.1 | 63.8 | 26.86677 | 35.4 | 20   |
| 4.4 | 154.6 | 51.2 | 21.42155 | 35.6 | 20.2 |
| 4.6 | 158.9 | 54.8 | 21.70365 | 32.5 | 18   |
| 4.1 | 161.4 | 62.5 | 23.99236 | 36.3 | 20.6 |
| 4.1 | 171.6 | 67.6 | 22.95684 | 50   | 28.7 |
| 4.7 | 158.7 | 43.7 | 17.35112 | 36   | 20.3 |
| 4.3 | 157.5 | 66.2 | 26.68682 | 41.6 | 24   |
| 4.6 | 166.4 | 66   | 23.83621 | 50.5 | 30.1 |
| 4.7 | 177.1 | 73.6 | 23.46609 | 50.8 | 29.1 |
| 3.9 | 164.3 | 67.3 | 24.93101 | 47.3 | 26.5 |
| 4.1 | 180   | 83.1 | 25.64815 | 59.5 | 34.5 |
| -   | 142.9 | 37.2 | 18.21707 | 29.7 | 15.9 |
| 4.8 | 159.3 | 73.6 | 29.00322 | 38.9 | 22.1 |
| 4.1 | 150.2 | 36.4 | 16.13472 | 28.2 | 15.4 |
| 4.4 | 152.7 | 60.4 | 25.90352 | 35.2 | 19.7 |
| 4.1 | 160.1 | 62.1 | 24.22752 | 36   | 20.2 |
| 3.6 | 151.7 | 53.9 | 23.42166 | 35.1 | 20   |
| 4.3 | 157.3 | 71.6 | 28.93714 | 43.3 | 24.4 |
| 4.3 | 163.9 | 67.2 | 25.01563 | 44.8 | 25.9 |
| 4.2 | 154.6 | 55.9 | 23.38799 | 43.1 | 24.8 |
| 4.5 | 154.7 | 51.9 | 21.68636 | 35.4 | 19.6 |
| 4.4 | 155.1 | 48.7 | 20.24442 | 34.8 | 19.7 |
| 4   | 157.6 | 63.5 | 25.56591 | 37   | 20.6 |
| 4.3 | 168   | 55   | 19.48696 | 40.9 | 23.4 |
| 4.3 | 160.1 | 60.3 | 23.52527 | 39.8 | 22.9 |
| 4.1 | 164.8 | 76.8 | 28.27788 | 51.5 | 30.2 |
| 4.4 | 168.7 | 64.3 | 22.59336 | 51.2 | 29.7 |
| 4.9 | 163.7 | 70.2 | 26.19629 | 44.1 | 25.5 |
| -   | 166.8 | 52.5 | 18.8698  | 41.2 | 23.7 |
| 4.4 | 168.1 | 66   | 23.35654 | 44.7 | 25.9 |
| 4.5 | 151.7 | 59.1 | 25.68126 | 35.7 | 20.1 |
| 4.5 | 150.4 | 64.9 | 28.69122 | 35.6 | 19.9 |
| 4.6 | 154.4 | 53.6 | 22.48383 | 33.3 | 18.6 |
| 4.2 | 163.2 | 59.7 | 22.41476 | 36   | 20.3 |

|     |       |      |          |      |      |
|-----|-------|------|----------|------|------|
| 4.2 | 149.6 | 61.7 | 27.56906 | 31.9 | 17.7 |
| 4.4 | 154.4 | 53.1 | 22.27409 | 33.2 | 18.6 |
| 4.1 | 150   | 51.9 | 23.06667 | 29.1 | 15.9 |
| 4.6 | 151.2 | 50.1 | 21.91463 | 33.3 | 18.8 |
| 4.4 | 161.6 | 53.5 | 20.48666 | 46.5 | 26.6 |
| 4.3 | 166.8 | 72.6 | 26.09423 | 48.1 | 27.9 |
| 4.4 | 144   | 53.8 | 25.94522 | 27.7 | 15   |
| 4.5 | 155.4 | 57.3 | 23.72753 | 41.8 | 24   |
| 4.7 | 180.3 | 62.1 | 19.10294 | 46.2 | 26.5 |
| 4.5 | 169   | 80.6 | 28.2203  | 49.7 | 28.8 |
| 5   | 168.5 | 57.9 | 20.39289 | 46.1 | 26.9 |
| 4.5 | 162.5 | 54.4 | 20.60118 | 40   | 22.8 |
| 4.6 | 161.8 | 83   | 31.70451 | 47.7 | 27.8 |
| 4   | 169.5 | 78.4 | 27.28831 | 49.5 | 28.9 |
| 4.1 | 152.7 | 55.3 | 23.71631 | 32.1 | 17.9 |
| 4.3 | 148.1 | 56.9 | 25.94192 | 27.7 | 15   |
| 4.3 | 153.7 | 60.1 | 25.44056 | 34.1 | 19   |
| 4.4 | 146.4 | 55.3 | 25.80138 | 32.9 | 18.5 |
| 4.7 | 150.5 | 64.5 | 28.47651 | 37.7 | 21.4 |
| 4.6 | 149.3 | 83.9 | 37.63937 | 38.9 | 21.8 |
| 4.3 | 147.1 | 41.5 | 19.17886 | 30.2 | 16.7 |
| 4.4 | 169   | 68.9 | 24.12381 | 42.7 | 24.2 |
| 4.2 | 169.8 | 76.7 | 26.60235 | 47.4 | 27.5 |
| 3.6 | 160.7 | 51.9 | 20.0972  | 37   | 20.5 |
| 4.4 | 164.2 | 46.8 | 17.35799 | 35.9 | 20.5 |
| 4.5 | 160.9 | 49   | 18.9271  | 33.6 | 18.7 |
| 4.4 | 150   | 66.6 | 29.6     | 33.6 | 18.8 |
| 3.9 | 166   | 73.1 | 26.5278  | 46.2 | 26.6 |
| 4.6 | 156.8 | 46.2 | 18.791   | 34.9 | 19.7 |
| 4.7 | 155.8 | 70.2 | 28.92026 | 42.8 | 24.8 |
| 4.1 | 158.9 | 66.4 | 26.29785 | 44.4 | 25.1 |
| 4.4 | 164.1 | 62.4 | 23.17221 | 44.7 | 25.5 |
| 3.8 | 167   | 51.1 | 18.32264 | 45.5 | 26.6 |
| 4.1 | 169.7 | 73.4 | 25.4878  | 48.8 | 28.2 |
| 4.1 | 148   | 72   | 32.87071 | 32.7 | 17.9 |
| 4.4 | 155.6 | 47.9 | 19.7841  | 33.6 | 18.8 |
| 4.5 | 147.8 | 49.7 | 22.75137 | 29.8 | 16.4 |
| 3.7 | 147.3 | 51.6 | 23.78177 | 33.3 | 18.4 |
| 4.6 | 152.4 | 44.4 | 19.1167  | 33.8 | 19   |

|   |     |       |      |          |      |      |
|---|-----|-------|------|----------|------|------|
|   | 4.3 | 149.5 | 36   | 16.1072  | 26.9 | 14.5 |
|   | 4.4 | 157   | 47.2 | 19.14885 | 36.1 | 20.2 |
|   | 4.4 | 160.9 | 74.2 | 28.66103 | 42.4 | 24.5 |
|   | 4.7 | 167.3 | 69.6 | 24.86665 | 42.7 | 24.1 |
|   | 4.2 | 168   | 66.4 | 23.52608 | 47.6 | 27.1 |
|   | 4.6 | 166   | 50.9 | 18.47148 | 37.3 | 21   |
|   | 4.5 | 162.1 | 74.2 | 28.23826 | 41.1 | 23.1 |
|   | 4.5 | 148.4 | 43.1 | 19.57084 | 29.2 | 16   |
|   | 4.1 | 153.2 | 60.2 | 25.6495  | 34.3 | 19.1 |
|   | 4   | 143.3 | 54.9 | 26.73499 | 29   | 15.9 |
| - |     | 164   | 49.9 | 18.55294 | 37.8 | 21.4 |
|   | 4.2 | 167.8 | 75.1 | 26.67203 | 46.1 | 26.5 |
|   | 4.2 | 162.5 | 56.5 | 21.39645 | 38.4 | 21.6 |
|   | 4.5 | 171.8 | 80.3 | 27.20628 | 54.5 | 31.9 |
|   | 4.3 | 162.2 | 67   | 25.46673 | 43.4 | 24.6 |
|   | 4.3 | 161.2 | 57.8 | 22.24323 | 38.1 | 21.8 |
|   | 4.5 | 147.4 | 46.7 | 21.49423 | 29.4 | 16.2 |
| - |     | 150.3 | 43.5 | 19.25623 | 28.2 | 15.2 |
|   | 4.3 | 146.6 | 54.9 | 25.54491 | 32.2 | 17.7 |
|   | 4.2 | 146.7 | 69.3 | 32.20127 | 32.1 | 17.7 |
|   | 4.8 | 148.4 | 54.4 | 24.70194 | 31.2 | 17   |
| - |     | 153.4 | 50.8 | 21.58803 | 32.8 | 18.1 |
|   | 4.1 | 174   | 81.7 | 26.98507 | 49.8 | 28.5 |
|   | 4.1 | 160.2 | 56.2 | 21.89834 | 39   | 22.1 |
|   | 4.3 | 163.4 | 60.8 | 22.77191 | 44.4 | 24.8 |
|   | 4.2 | 164.4 | 76.2 | 28.19365 | 45.9 | 26.4 |
|   | 3.8 | 168   | 63.8 | 22.60488 | 51   | 29.3 |
|   | 4.2 | 156.2 | 60.6 | 24.83765 | 40.8 | 23.3 |
|   | 4.4 | 159.5 | 58.2 | 22.87713 | 42.9 | 24.6 |
|   | 4.4 | 166.4 | 66.5 | 24.01679 | 43.7 | 24.4 |
|   | 4.2 | 158.2 | 67.3 | 26.8907  | 41.1 | 23.6 |
|   | 4.3 | 158.8 | 53.7 | 21.29479 | 38.8 | 21.9 |
|   | 4.6 | 162   | 75.9 | 28.9209  | 46.9 | 27.3 |
|   | 4.2 | 149   | 44.9 | 20.22431 | 31.7 | 17.7 |
|   | 4.2 | 165.6 | 65   | 23.70242 | 44.8 | 26   |
|   | 4.1 | 155.4 | 59.2 | 24.51431 | 39.5 | 22.7 |
|   | 4   | 161.1 | 45.9 | 17.68567 | 36.4 | 20.6 |
|   | 4.4 | 169.8 | 60.6 | 21.01828 | 48.1 | 27.9 |
|   | 4.9 | 144.8 | 36   | 17.16981 | 25.9 | 14   |

|   |     |       |      |          |      |      |
|---|-----|-------|------|----------|------|------|
|   | 3.5 | 144   | 60.6 | 29.22454 | 29   | 15.5 |
|   | 4.4 | 154.4 | 46.7 | 19.58945 | 32.7 | 17.8 |
|   | 3.9 | 146.2 | 60.4 | 28.25805 | 33.9 | 18.9 |
|   | 4.1 | 164   | 63.1 | 23.46074 | 39.9 | 22.5 |
|   | 4.5 | 166.9 | 72.1 | 25.88348 | 43.4 | 24.2 |
|   | 4.1 | 157.1 | 57.4 | 23.25731 | 40.5 | 23   |
|   | 4.2 | 170.2 | 62.1 | 21.43742 | 43.8 | 25   |
| - |     | 154.2 | 54.3 | 22.83658 | 30.6 | 16.8 |
|   | 4.7 | 143.5 | 41.6 | 20.20177 | 26.5 | 14.1 |
| - |     | 158.3 | 75.5 | 30.12903 | 45.7 | 25.9 |
|   | 3.7 | 166.7 | 60.1 | 21.62735 | 39.5 | 22.2 |
|   | 4.1 | 157.8 | 47.6 | 19.11582 | 36.9 | 20.8 |
|   | 4.3 | 166.4 | 69.4 | 25.06414 | 47.3 | 27.2 |
|   | 4.5 | 160.2 | 71.2 | 27.7431  | 40.6 | 22.8 |
|   | 4.3 | 158.5 | 59.4 | 23.64438 | 42.3 | 24.4 |
|   | 4.4 | 158.8 | 65   | 25.77581 | 43.3 | 24.9 |
|   | 4.4 | 142.3 | 47.4 | 23.40823 | 28.4 | 15.3 |
| - |     | 143   | 60.7 | 29.6836  | 28.2 | 15.1 |
|   | 4.4 | 152.7 | 47.2 | 20.24249 | 30.8 | 16.9 |
|   | 3.7 | 151.5 | 56.4 | 24.57275 | 31   | 16.9 |
|   | 4.2 | 166.3 | 59.4 | 21.4784  | 35.6 | 19.6 |
|   | 4.1 | 154.2 | 40.7 | 17.11692 | 30.1 | 16.6 |
|   | 4.4 | 142.2 | 51.7 | 25.56768 | 29.3 | 16.1 |
|   | 3.6 | 154.8 | 55.4 | 23.11894 | 32.8 | 17.9 |
|   | 4.3 | 153.7 | 49.4 | 20.91121 | 31.4 | 17.2 |
| - |     | 165.9 | 64.6 | 23.47144 | 43.7 | 25.2 |
| - |     | 169.5 | 68.8 | 23.94689 | 41.2 | 23   |
|   | 3.8 | 153.2 | 57.6 | 24.54172 | 38.1 | 21.2 |
|   | 4.1 | 164   | 72.2 | 26.84414 | 45.4 | 26.1 |
|   | 4.3 | 162.4 | 60.6 | 22.97738 | 34.6 | 19.2 |
|   | 3.9 | 150   | 47   | 20.88889 | 31.2 | 16.9 |
|   | 4.3 | 144.7 | 46.3 | 22.11281 | 27.9 | 15.1 |
| - |     | 148.1 | 76.3 | 34.7868  | 35.6 | 19.8 |
|   | 4.4 | 147.6 | 44.5 | 20.42619 | 25.3 | 13.4 |
|   | 3.8 | 164.8 | 70.4 | 25.92139 | 42.2 | 24   |
|   | 4.4 | 169.7 | 69.8 | 24.23772 | 49.3 | 28.5 |
|   | 3.3 | 162.2 | 66   | 25.08662 | 42   | 23.4 |
| - |     | 151.4 | 49.4 | 21.55139 | 29.4 | 16   |
|   | 4.3 | 148.7 | 51.1 | 23.10995 | 30.1 | 16.1 |

|   |     |       |      |          |      |      |
|---|-----|-------|------|----------|------|------|
|   | 4.2 | 150.1 | 51.8 | 22.99156 | 27.5 | 14.8 |
|   | 3.9 | 153.4 | 67.8 | 28.81237 | 35.7 | 19.9 |
|   | 3.8 | 154.8 | 69.5 | 29.003   | 37.6 | 20.7 |
|   | 4.3 | 136.5 | 39.4 | 21.14613 | 24.1 | 12.8 |
|   | 4.4 | 145.7 | 60.5 | 28.49944 | 32.8 | 18.1 |
|   | 4   | 148.4 | 42.5 | 19.29839 | 28.3 | 15.2 |
|   | 4.3 | 153   | 45   | 19.22338 | 33.4 | 18.6 |
|   | 3.3 | 150   | 57.8 | 25.68889 | 40.5 | 21.2 |
|   | 4.3 | 142   | 40.2 | 19.93652 | 25.2 | 13.4 |
| - |     | 165.8 | 68.1 | 24.77297 | 40.3 | 22.6 |
|   | 4.1 | 153   | 45.2 | 19.30881 | 32.3 | 17.5 |
|   | 4.1 | 154.5 | 56.8 | 23.79531 | 34.2 | 19   |
|   | 4.1 | 155.9 | 66   | 27.15512 | 36.4 | 20.4 |
|   | 3   | 165.7 | 57.9 | 21.08791 | 39.8 | 21.9 |
|   | 4.2 | 162   | 56   | 21.33821 | 34   | 18.9 |
|   | 3.7 | 158.5 | 57.8 | 23.00749 | 38.9 | 21.8 |
|   | 4.1 | 156.7 | 49.2 | 20.03674 | 32.2 | 17.8 |
|   | 3.8 | 165.5 | 65.1 | 23.76758 | 42.2 | 23.3 |
| - |     | 166.7 | 57.2 | 20.58377 | 39.3 | 22.1 |
|   | 3.5 | 159.6 | 57.8 | 22.69144 | 39.4 | 21.6 |
|   | 4.1 | 143   | 55.4 | 27.09179 | 26.8 | 14.2 |
|   | 4.4 | 172.4 | 62.4 | 20.99472 | 42.8 | 24.3 |
|   | 4.2 | 142.8 | 40.5 | 19.86089 | 30.7 | 16.1 |
|   | 3.4 | 145   | 47.1 | 22.4019  | 25.8 | 13.3 |
|   | 4.5 | 150.1 | 60.3 | 26.7643  | 34.4 | 19   |
|   | 4.2 | 147   | 66.6 | 30.82049 | 31.2 | 16.9 |
|   | 4.4 | 139.9 | 62   | 31.67789 | 27.9 | 14.9 |
|   | 4.1 | 147.4 | 50.2 | 23.10515 | 30.6 | 16.6 |
| - |     | 148   | 53.4 | 24.37911 | 32.7 | 18.1 |
|   | 3.9 | 146.2 | 46.8 | 21.89531 | 25.9 | 13.5 |
|   | 3.8 | 135   | 42.7 | 23.42936 | 20.8 | 10.5 |
| - |     | 159   | 65.5 | 25.90879 | 38.2 | 21.6 |
|   | 3.8 | 141.9 | 41   | 20.36194 | 27.2 | 14.3 |
|   | 4.4 | 152.6 | 53.2 | 22.8456  | 31.2 | 17.1 |
|   | 4.3 | 134.3 | 53.8 | 29.82842 | 26.7 | 14   |
|   | 4.2 | 137.3 | 46.6 | 24.71979 | 27.4 | 14.6 |
|   | 4.4 | 157.5 | 60.3 | 24.30839 | 41   | 22.6 |
|   | 4   | 147.4 | 41   | 18.87074 | 25.6 | 13.3 |
|   | 4.3 | 145.4 | 55.5 | 26.25211 | 28.6 | 15.3 |

| Fat free mass | SMI      | Body fat percentage | Fat  | Renal failure | Albuminuria |
|---------------|----------|---------------------|------|---------------|-------------|
| 47.2          | 6.84719  | 26.3                | 16.8 | 0             | 1           |
| 52.9          | 8.079585 | 28.9                | 21.5 | 0             | 1           |
| 54.4          | 8.532871 | 25.8                | 19   | 0             | 0           |
| 53.5          | 7.895062 | 17.7                | 11.5 | 0             | 0           |
| 35.3          | 5.986304 | 32.9                | 17.3 | 0             | 0           |
| 38.4          | 6.069853 | 16.8                | 7.7  | 0             | 1           |
| 55            | 8.57463  | 34.9                | 29.5 | 0             | 0           |
| 33.8          | 5.795785 | 34.9                | 18.2 | 0             | 1           |
| 43.4          | 7.464997 | 31                  | 19.5 | 0             | 0           |
| 60.9          | 9.092192 | 29                  | 24.8 | 0             | 1           |
| 52.2          | 8.253767 | 17.2                | 10.8 | 0             | 0           |
| 51.1          | 7.76319  | 24.1                | 16.2 | 0             | 1           |
| 59.1          | 8.870977 | 29.9                | 25.2 | 0             | 1           |
| 45.7          | 6.825971 | 24.3                | 14.7 | 0             | 0           |
| 48.5          | 7.266865 | 25.9                | 17   | 0             | 0           |
| 37.7          | 5.595795 | 24.3                | 12.1 | 0             | 0           |
| 38.7          | 6.218072 | 25.5                | 13.2 | 0             | 1           |
| 30.6          | 4.97626  | 30.2                | 13.2 | 0             | 0           |
| 36.7          | 6.189966 | 31.2                | 16.6 | 0             | 0           |
| 51.1          | 9.313819 | 54.7                | 61.6 | 0             | 1           |
| 36.1          | 6.262903 | 26.3                | 12.9 | 0             | 0           |
| 53.3          | 8.470167 | 28.9                | 21.7 | 0             | 1           |
| 50.1          | 8.020881 | 25                  | 16.7 | 0             | 0           |
| 56.9          | 8.909811 | 26.2                | 20.2 | 0             | 0           |
| 50.3          | 7.67412  | 32.4                | 24.2 | 0             | 1           |
| 55.8          | 8.422275 | 34                  | 28.7 | 0             | 1           |
| 41.6          | 6.449946 | 15.3                | 7.5  | 0             | 1           |
| 38.3          | 6.198443 | 35                  | 20.7 | 1             | 1           |
| 42.5          | 7.881295 | 45.3                | 35.3 | 0             | 1           |
| 41.8          | 6.466821 | 15.8                | 7.8  | 0             | 0           |
| 39.1          | 6.704167 | 39.5                | 25.4 | 1             | 1           |
| 37.8          | 5.713826 | 37.5                | 22.8 | 0             | 0           |
| 44.2          | 7.894652 | 27.8                | 17   | 0             | 1           |
| 45.7          | 7.6514   | 25.2                | 15.4 | 0             | 0           |
| 64.4          | 9.833489 | 31                  | 29   | 0             | 0           |
| 48.7          | 8.136214 | 19.2                | 11.5 | 0             | 0           |
| 37.2          | 6.738347 | 37.3                | 22.2 | 0             | 0           |
| 32.9          | 5.796496 | 34.9                | 17.6 | 0 -           |             |

|      |          |      |      |     |   |
|------|----------|------|------|-----|---|
| 42.4 | 7.142948 | 36.6 | 24.5 | 0   | 0 |
| 35.2 | 5.940764 | 40.7 | 24.2 | 0   | 0 |
| 37.1 | 7.409365 | 42   | 26.9 | 0   | 1 |
| 50.8 | 7.841798 | 31.9 | 23.8 | 0   | 0 |
| 52.9 | 7.83963  | 23   | 15.8 | 0   | 1 |
| 48.1 | 7.181457 | 24.1 | 15.3 | 0   | 0 |
| 63.1 | 8.840886 | 20   | 15.8 | 0 - |   |
| 28.1 | 5.115139 | 27.4 | 10.7 | 0   | 0 |
| 36.7 | 6.587604 | 33.6 | 18.6 | 0   | 0 |
| 49.5 | 8.006028 | 34.8 | 26.4 | 0   | 1 |
| 47.9 | 7.30806  | 28   | 18.6 | 0   | 1 |
| 58.6 | 8.341916 | 36   | 33   | 0   | 1 |
| 54.6 | 8.316263 | 25.6 | 18.8 | 0   | 1 |
| 38   | 6.375154 | 29.5 | 16   | 0   | 0 |
| 48.1 | 7.943193 | 20.7 | 12.6 | 0 - |   |
| 46.4 | 7.294237 | 20.3 | 11.8 | 0   | 0 |
| 50.8 | 8.658905 | 33.2 | 25.3 | 0   | 0 |
| 41.2 | 6.757263 | 34.3 | 21.5 | 0 - |   |
| 42.9 | 6.941219 | 23.6 | 13.3 | 0   | 0 |
| 41   | 7.692748 | 44.5 | 33   | 1   | 1 |
| 32.4 | 5.51734  | 39.4 | 21.1 | 0   | 0 |
| 30.1 | 5.120607 | 29.6 | 12.6 | 0   | 1 |
| 44.1 | 6.91503  | 29.2 | 18.2 | 0   | 0 |
| 31.8 | 5.702422 | 33   | 15.7 | 0   | 0 |
| 37.5 | 6.717076 | 41.5 | 26.6 | 0   | 0 |
| 38   | 6.649914 | 38.9 | 24.3 | 0   | 0 |
| 45.9 | 7.036331 | 18.1 | 10.1 | 0   | 0 |
| 49.7 | 7.454936 | 27   | 18.3 | 0   | 0 |
| 36.1 | 6.328544 | 14.8 | 6.3  | 0   | 0 |
| 51.4 | 8.416666 | 34.5 | 27.1 | 0   | 0 |
| 35.3 | 5.792253 | 29.4 | 14.7 | 0   | 0 |
| 38.3 | 6.455184 | 41.1 | 26.7 | 0   | 1 |
| 34.7 | 5.802561 | 41.5 | 24.7 | 0   | 1 |
| 33.2 | 5.64578  | 33.5 | 16.8 | 0 - |   |
| 41.2 | 6.384567 | 24.9 | 13.7 | 0   | 1 |
| 45.8 | 6.941805 | 31.4 | 20.9 | 0   | 1 |
| 49.4 | 7.384379 | 40.4 | 33.4 | 0   | 0 |
| 46.5 | 7.060576 | 14.6 | 8    | 0   | 0 |
| 56.8 | 8.479146 | 29.8 | 24   | 0   | 0 |



|      |          |      |      |     |   |
|------|----------|------|------|-----|---|
| 56.6 | 8.368133 | 28   | 22   | 0   | 0 |
| 46.3 | 7.689569 | 22   | 13   | 0   | 0 |
| 50.6 | 8.414607 | 18.7 | 11.7 | 0   | 1 |
| 34.2 | 5.781386 | 29.3 | 14.1 | 0   | 0 |
| 44.9 | 7.70838  | 49.9 | 44.9 | 0   | 0 |
| 37.5 | 6.459815 | 41.3 | 26.3 | 1 - |   |
| 37.7 | 6.321869 | 26.4 | 13.5 | 0   | 0 |
| 34.5 | 5.627899 | 37.1 | 20.3 | 0   | 0 |
| 38.4 | 6.510567 | 38.5 | 24.1 | 0   | 0 |
| 52.8 | 7.651148 | 21.9 | 14.8 | 0 - |   |
| 38   | 6.24164  | 13.1 | 5.7  | 0   | 1 |
| 43.8 | 7.764172 | 33.9 | 22.4 | 1   | 1 |
| 53.3 | 8.147652 | 19.3 | 12.7 | 0   | 0 |
| 53.7 | 7.709375 | 27   | 19.9 | 0   | 1 |
| 50   | 8.353557 | 25.7 | 17.3 | 1   | 1 |
| 63.1 | 8.694444 | 24.1 | 20   | 0   | 0 |
| 31.8 | 5.754047 | 14.6 | 5.4  | 0   | 1 |
| 41.1 | 6.718817 | 44.2 | 32.5 | 0   | 0 |
| 30.1 | 4.609921 | 17.4 | 6.3  | 0   | 1 |
| 37.2 | 6.488747 | 38.3 | 23.2 | 0   | 0 |
| 38.2 | 6.109548 | 38.5 | 23.9 | 0 - |   |
| 37   | 6.648448 | 31.3 | 16.9 | 0   | 0 |
| 45.9 | 8.224452 | 35.9 | 25.7 | 0   | 1 |
| 47.3 | 7.582861 | 29.6 | 19.9 | 0   | 1 |
| 45.2 | 8.192071 | 19.2 | 10.7 | 0   | 0 |
| 37.8 | 5.987776 | 27.2 | 14.1 | 0   | 1 |
| 36.8 | 6.152309 | 24.4 | 11.9 | 0   | 1 |
| 39.2 | 6.538432 | 38.2 | 24.3 | 0   | 0 |
| 43.2 | 6.409439 | 21.5 | 11.8 | 0   | 1 |
| 42.1 | 6.909329 | 30.1 | 18.2 | 0   | 1 |
| 54.3 | 8.475999 | 29.3 | 22.5 | 0   | 1 |
| 53.9 | 8.222156 | 16.1 | 10.4 | 0   | 0 |
| 46.6 | 7.302868 | 33.7 | 23.6 | 0   | 1 |
| 43.6 | 6.929708 | 17   | 8.9  | 0   | 0 |
| 47.2 | 7.396238 | 28.5 | 18.8 | 0   | 0 |
| 37.6 | 6.56154  | 36.4 | 21.5 | 0   | 1 |
| 37.6 | 6.998182 | 42.1 | 27.3 | 0   | 0 |
| 35.3 | 5.922978 | 34.2 | 18.3 | 0   | 1 |
| 38.3 | 5.894668 | 35.9 | 21.4 | 0   | 0 |

|      |          |      |      |     |   |
|------|----------|------|------|-----|---|
| 33.7 | 6.255541 | 45.4 | 28   | 0   | 0 |
| 35.2 | 5.826499 | 33.6 | 17.9 | 0   | 0 |
| 31.1 | 4.991111 | 40   | 20.8 | 0   | 1 |
| 35.2 | 5.927011 | 29.7 | 14.9 | 0   | 1 |
| 49.2 | 7.865344 | 8.1  | 4.3  | 0   | 0 |
| 50.7 | 7.936097 | 30.2 | 21.9 | 0   | 1 |
| 29.3 | 5.627894 | 45.6 | 24.5 | 1   | 1 |
| 44.1 | 7.888473 | 23   | 13.2 | 1   | 1 |
| 48.9 | 6.921354 | 21.2 | 13.2 | 0   | 0 |
| 52.5 | 8.122965 | 34.8 | 28.1 | 0   | 0 |
| 48.9 | 7.163927 | 15.5 | 9    | 0   | 1 |
| 42.3 | 6.627219 | 22.2 | 12.1 | 0   | 1 |
| 50.3 | 8.380686 | 39.5 | 32.7 | 0   | 0 |
| 52.4 | 8.019422 | 33.1 | 26   | 0   | 0 |
| 34   | 5.9012   | 38.5 | 21.3 | 0   | 0 |
| 29.5 | 5.010575 | 48.2 | 27.4 | 0   | 1 |
| 36.1 | 6.154839 | 40   | 24   | 0   | 0 |
| 34.6 | 6.970572 | 37.4 | 20.7 | 0   | 0 |
| 39.7 | 6.966811 | 38.4 | 24.8 | 0   | 0 |
| 40.9 | 7.877799 | 51.2 | 43   | 0   | 0 |
| 32.1 | 5.568801 | 22.6 | 9.4  | 0 - |   |
| 45   | 7.153111 | 34.7 | 23.9 | 0   | 0 |
| 50   | 7.692831 | 34.9 | 26.7 | 0   | 0 |
| 39.3 | 5.99431  | 24.3 | 12.6 | 0   | 1 |
| 38.1 | 5.85276  | 18.6 | 8.7  | 0   | 0 |
| 35.7 | 5.519759 | 27.2 | 13.3 | 1   | 0 |
| 35.6 | 6.235556 | 46.5 | 31   | 0   | 1 |
| 48.9 | 7.613587 | 33.1 | 24.2 | 0   | 0 |
| 37   | 5.926079 | 20   | 9.2  | 0   | 0 |
| 45.1 | 7.934533 | 35.7 | 25.1 | 0   | 0 |
| 46.9 | 7.885395 | 29.4 | 19.5 | 0   | 0 |
| 47.2 | 7.245029 | 24.4 | 15.2 | 0   | 1 |
| 47.8 | 7.773674 | 6.4  | 3.3  | 0   | 1 |
| 51.6 | 7.729679 | 29.7 | 21.8 | 0   | 0 |
| 34.5 | 6.656318 | 52.1 | 37.5 | 0   | 0 |
| 35.7 | 5.960012 | 25.4 | 12.2 | 0   | 0 |
| 31.6 | 5.552799 | 36.4 | 18.1 | 0   | 1 |
| 35.3 | 6.507725 | 31.6 | 16.3 | 0   | 0 |
| 35.8 | 6.217235 | 19.4 | 8.6  | 0   | 0 |

|      |          |      |      |     |   |
|------|----------|------|------|-----|---|
| 28.5 | 4.518965 | 21   | 7.5  | 0   | 0 |
| 38.4 | 5.955617 | 18.6 | 8.8  | 0   | 1 |
| 44.8 | 7.300451 | 39.6 | 29.4 | 0   | 1 |
| 45.4 | 6.870485 | 34.7 | 24.2 | 0   | 0 |
| 50.3 | 7.702664 | 24.2 | 16.1 | 0   | 0 |
| 39.4 | 6.154739 | 22.6 | 11.5 | 0   | 0 |
| 43.3 | 7.341185 | 41.6 | 30.9 | 1   | 1 |
| 31   | 5.171969 | 28.1 | 12.1 | 0   | 0 |
| 36.4 | 6.152472 | 39.5 | 23.8 | 0   | 0 |
| 30.8 | 5.546657 | 44   | 24.1 | 0   | 1 |
| 40   | 6.153331 | 19.9 | 9.9  | 0   | 0 |
| 48.7 | 7.898614 | 35.1 | 26.4 | 0   | 0 |
| 40.6 | 6.388639 | 28.2 | 15.9 | 0   | 1 |
| 57.5 | 8.653157 | 28.4 | 22.8 | 0   | 0 |
| 45.8 | 7.833869 | 31.7 | 21.2 | 0   | 1 |
| 40.3 | 6.434372 | 30.2 | 17.5 | 0   | 0 |
| 31.3 | 5.421885 | 32.9 | 15.4 | 0   | 1 |
| 30.1 | 5.055314 | 30.9 | 13.4 | 0   | 0 |
| 34   | 6.239659 | 38.1 | 20.9 | 0   | 1 |
| 34   | 6.077816 | 50.9 | 35.3 | 0   | 0 |
| 33.2 | 5.834926 | 38.9 | 21.2 | 0 - |   |
| 35   | 5.881463 | 31.1 | 15.8 | 0   | 0 |
| 52.5 | 7.956797 | 35.7 | 29.2 | 1   | 1 |
| 41.1 | 6.585089 | 26.9 | 15.1 | 0   | 0 |
| 47.3 | 8.288526 | 22.1 | 13.5 | 1   | 1 |
| 48.5 | 7.836503 | 36.3 | 27.7 | 0   | 1 |
| 54.2 | 8.655754 | 15.1 | 9.6  | 0   | 0 |
| 42.9 | 7.426704 | 29.3 | 17.7 | 0   | 0 |
| 45.6 | 7.330903 | 21.7 | 12.6 | 0   | 1 |
| 46.1 | 8.118759 | 30.6 | 20.4 | 0   | 1 |
| 43.6 | 7.699611 | 35.3 | 23.7 | 0   | 0 |
| 41.2 | 6.543091 | 23.3 | 12.5 | 0   | 0 |
| 49.6 | 8.139003 | 34.6 | 26.3 | 0   | 1 |
| 33.7 | 5.774515 | 24.9 | 11.2 | 0   | 0 |
| 47.3 | 7.53737  | 27.3 | 17.7 | 0   | 0 |
| 41.7 | 7.147247 | 29.5 | 17.5 | 0   | 1 |
| 38.5 | 6.033936 | 16.1 | 7.4  | 0   | 0 |
| 51.1 | 7.814223 | 15.7 | 9.5  | 0 - |   |
| 27.7 | 4.445072 | 23.2 | 8.3  | 0   | 0 |

|      |          |      |      |     |   |
|------|----------|------|------|-----|---|
| 30.7 | 5.574846 | 49.4 | 29.9 | 0   | 1 |
| 34.8 | 5.465751 | 25.4 | 11.9 | 0   | 1 |
| 35.8 | 6.760411 | 40.8 | 24.6 | 0   | 1 |
| 42.2 | 6.900654 | 33.1 | 20.9 | 0   | 1 |
| 46.1 | 7.413228 | 36.1 | 26   | 0   | 1 |
| 42.6 | 7.528238 | 25.7 | 14.8 | 0   | 0 |
| 46.3 | 6.955942 | 25.5 | 15.8 | 0   | 0 |
| 32.5 | 5.429471 | 40.1 | 21.8 | 0   | 0 |
| 28.4 | 4.686229 | 31.8 | 13.2 | 0   | 0 |
| 47.9 | 8.611714 | 36.6 | 27.6 | 1   | 1 |
| 41.7 | 6.427029 | 30.6 | 18.4 | 0   | 1 |
| 39   | 6.574075 | 18.1 | 8.6  | 0   | 0 |
| 50   | 7.692597 | 27.9 | 19.4 | 0   | 0 |
| 42.6 | 7.263081 | 40.2 | 28.6 | 0   | 1 |
| 44.6 | 7.272438 | 24.9 | 14.8 | 0   | 1 |
| 45.5 | 7.704985 | 29.9 | 19.5 | 0   | 1 |
| 30.2 | 5.575504 | 36.3 | 17.2 | 0   | 1 |
| 29.8 | 5.775344 | 51   | 30.9 | 0   | 1 |
| 32.8 | 5.279344 | 30.5 | 14.4 | 0   | 0 |
| 33   | 5.302312 | 41.5 | 23.4 | 0   | 0 |
| 37.8 | 5.749269 | 36.3 | 21.6 | 0   | 0 |
| 32.1 | 4.849094 | 21.2 | 8.6  | 0   | 0 |
| 31   | 5.647639 | 40.1 | 29.3 | 0   | 1 |
| 34.8 | 5.817292 | 37.2 | 20.6 | 0   | 1 |
| 33.4 | 5.354794 | 32.3 | 16   | 0 - |   |
| 46.1 | 7.150433 | 28.6 | 18.5 | 0   | 0 |
| 43.6 | 7.107491 | 36.6 | 25.2 | 1   | 0 |
| 40   | 7.383819 | 30.5 | 17.6 | 0   | 1 |
| 47.9 | 7.711184 | 33.6 | 24.3 | 0   | 0 |
| 36.6 | 6.024928 | 39.6 | 24   | 0   | 1 |
| 33.4 | 5.346667 | 29   | 13.6 | 0   | 1 |
| 29.8 | 5.105528 | 35.6 | 16.5 | 0   | 1 |
| 37.6 | 6.656451 | 50.7 | 38.7 | 0   | 1 |
| 27.1 | 4.071467 | 39.2 | 17.4 | 0   | 1 |
| 44.6 | 7.098925 | 36.7 | 25.8 | 0   | 1 |
| 52.1 | 7.851215 | 25.3 | 17.7 | 0   | 1 |
| 44.4 | 7.373947 | 32.7 | 21.6 | 0   | 0 |
| 31.3 | 5.082462 | 36.7 | 18.1 | 0   | 1 |
| 32.1 | 5.282274 | 37.1 | 19   | 0   | 1 |

|      |          |      |      |     |   |
|------|----------|------|------|-----|---|
| 29.3 | 4.975586 | 43.4 | 22.5 | 0   | 0 |
| 37.7 | 6.68039  | 44.3 | 30.1 | 0   | 1 |
| 39.9 | 7.060874 | 42.6 | 29.6 | 0   | 0 |
| 25.6 | 4.771297 | 35.1 | 13.8 | 1   | 0 |
| 34.8 | 6.557226 | 42.4 | 25.7 | 0 - |   |
| 30.3 | 4.976715 | 28.6 | 12.2 | 0   | 1 |
| 35.4 | 5.984878 | 21.4 | 9.6  | 0   | 0 |
| 42.9 | 9.151111 | 25.9 | 14.9 | 0   | 1 |
| 27   | 4.255108 | 32.7 | 13.2 | 0   | 1 |
| 42.7 | 6.711619 | 37.4 | 25.4 | 0   | 1 |
| 34.5 | 5.66876  | 23.6 | 10.7 | 0   | 0 |
| 36.1 | 6.225322 | 36.4 | 20.7 | 0   | 0 |
| 38.5 | 6.422597 | 41.7 | 27.5 | 0   | 1 |
| 42.3 | 6.289952 | 27   | 15.6 | 0   | 1 |
| 36.1 | 5.620332 | 35.5 | 19.9 | 0   | 0 |
| 41.1 | 6.818657 | 28.8 | 16.7 | 0   | 0 |
| 34.2 | 5.457161 | 30.5 | 15   | 0   | 1 |
| 44.6 | 7.221548 | 31.4 | 20.5 | 1   | 1 |
| 41.6 | 6.452219 | 27.3 | 15.6 | 0   | 1 |
| 41.7 | 7.160759 | 27.9 | 16.1 | 1   | 0 |
| 28.5 | 4.763069 | 48.6 | 26.9 | 0   | 1 |
| 45.2 | 6.685338 | 27.6 | 17.2 | 0   | 1 |
| 32.4 | 6.860587 | 20   | 8.1  | 0   | 1 |
| 27.6 | 4.775268 | 41.4 | 19.5 | 0   | 1 |
| 36.5 | 6.484684 | 39.4 | 23.8 | 0   | 1 |
| 33.1 | 6.316812 | 50.2 | 33.5 | 1   | 1 |
| 29.5 | 5.431226 | 52.3 | 32.5 | 0   | 1 |
| 32.5 | 5.684235 | 35.3 | 17.7 | 0   | 1 |
| 34.7 | 5.998904 | 35.1 | 18.7 | 0   | 1 |
| 27.7 | 4.299528 | 40.7 | 19.1 | 0   | 1 |
| 22.2 | 3.978052 | 48   | 20.5 | 0 - |   |
| 40.4 | 6.609707 | 38.3 | 25.1 | 0   | 0 |
| 29.3 | 5.05572  | 28.5 | 11.7 | 0   | 0 |
| 33.1 | 5.427977 | 37.8 | 20.1 | 0   | 1 |
| 28.3 | 5.455607 | 47.4 | 25.5 | 1   | 1 |
| 29.2 | 5.66009  | 37.4 | 17.4 | 1   | 1 |
| 43.2 | 7.687579 | 28.4 | 17.1 | 0   | 1 |
| 27.6 | 3.976663 | 32.6 | 13.4 | 0   | 1 |
| 30.2 | 5.590989 | 45.6 | 25.3 | 0   | 0 |

| CAD | CVD | Hypertension | Hyperlipidemia | DPP4i | SGLT2i | SU |
|-----|-----|--------------|----------------|-------|--------|----|
| 1   | 0   | 0            | 1              | 1     | 1      | 0  |
| 0   | 0   | 1            | 1              | 0     | 0      | 0  |
| 0   | 0   | 1            | 1              | 0     | 0      | 0  |
| 0   | 0   | 0            | 0              | 0     | 0      | 0  |
| 0   | 0   | 0            | 1              | 0     | 0      | 0  |
| 0   | 0   | 0            | 0              | 1     | 0      | 0  |
| 0   | 0   | 1            | 1              | 1     | 0      | 0  |
| 0   | 0   | 1            | 1              | 1     | 0      | 0  |
| 0   | 0   | 1            | 1              | 1     | 1      | 0  |
| 0   | 0   | 1            | 1              | 0     | 1      | 0  |
| 0   | 1   | 0            | 1              | 1     | 1      | 0  |
| 1   | 1   | 1            | 1              | 1     | 0      | 1  |
| 0   | 0   | 0            | 1              | 1     | 1      | 0  |
| 0   | 0   | 0            | 0              | 1     | 1      | 0  |
| 0   | 0   | 0            | 0              | 1     | 0      | 0  |
| 0   | 0   | 1            | 1              | 1     | 1      | 0  |
| 0   | 0   | 0            | 0              | 0     | 0      | 0  |
| 1   | 1   | 1            | 1              | 1     | 1      | 0  |
| 0   | 0   | 1            | 1              | 1     | 1      | 0  |
| 0   | 0   | 1            | 1              | 0     | 1      | 0  |
| 0   | 0   | 1            | 0              | 1     | 0      | 1  |
| 0   | 0   | 0            | 0              | 0     | 1      | 0  |
| 0   | 0   | 0            | 0              | 1     | 0      | 1  |
| 0   | 1   | 1            | 1              | 1     | 0      | 1  |
| 0   | 0   | 1            | 1              | 1     | 1      | 0  |
| 0   | 0   | 0            | 1              | 1     | 1      | 0  |
| 0   | 0   | 1            | 1              | 1     | 1      | 1  |
| 0   | 1   | 1            | 1              | 1     | 0      | 1  |
| 0   | 0   | 0            | 0              | 0     | 1      | 0  |
| 0   | 0   | 1            | 1              | 1     | 0      | 1  |
| 1   | 0   | 1            | 1              | 1     | 1      | 0  |
| 0   | 0   | 1            | 1              | 1     | 1      | 0  |
| 0   | 0   | 0            | 1              | 1     | 1      | 0  |
| 0   | 0   | 1            | 1              | 1     | 0      | 0  |
| 0   | 0   | 0            | 0              | 1     | 1      | 1  |
| 0   | 0   | 1            | 1              | 1     | 1      | 0  |
| 0   | 0   | 0            | 0              | 1     | 1      | 0  |
| 0   | 0   | 1            | 1              | 1     | 1      | 0  |
| 0   | 0   | 0            | 0              | 1     | 0      | 0  |

|   |   |   |   |   |   |   |
|---|---|---|---|---|---|---|
| 0 | 0 | 1 | 1 | 1 | 1 | 0 |
| 0 | 0 | 0 | 1 | 1 | 0 | 0 |
| 0 | 0 | 1 | 1 | 0 | 0 | 0 |
| 0 | 0 | 1 | 1 | 1 | 0 | 0 |
| 0 | 0 | 1 | 1 | 0 | 0 | 0 |
| 0 | 0 | 1 | 1 | 0 | 1 | 0 |
| 0 | 0 | 0 | 0 | 1 | 0 | 0 |
| 0 | 0 | 0 | 1 | 1 | 0 | 0 |
| 1 | 0 | 0 | 1 | 0 | 0 | 0 |
| 0 | 0 | 0 | 1 | 1 | 0 | 1 |
| 0 | 0 | 1 | 1 | 1 | 1 | 0 |
| 1 | 0 | 1 | 1 | 0 | 1 | 0 |
| 0 | 0 | 1 | 1 | 1 | 0 | 0 |
| 1 | 0 | 1 | 1 | 1 | 0 | 0 |
| 0 | 0 | 1 | 1 | 1 | 0 | 0 |
| 0 | 0 | 0 | 0 | 0 | 1 | 0 |
| 0 | 0 | 0 | 0 | 1 | 0 | 0 |
| 0 | 0 | 1 | 1 | 0 | 0 | 0 |
| 0 | 0 | 1 | 1 | 1 | 0 | 1 |
| 0 | 0 | 1 | 1 | 0 | 0 | 0 |
| 0 | 0 | 1 | 0 | 1 | 0 | 1 |
| 0 | 0 | 1 | 0 | 0 | 0 | 0 |
| 0 | 0 | 0 | 1 | 1 | 0 | 1 |
| 0 | 0 | 1 | 1 | 0 | 1 | 0 |
| 0 | 0 | 1 | 1 | 0 | 0 | 0 |
| 0 | 0 | 1 | 1 | 0 | 1 | 0 |
| 0 | 0 | 1 | 0 | 1 | 0 | 1 |
| 0 | 0 | 0 | 1 | 1 | 0 | 0 |
| 1 | 0 | 1 | 1 | 0 | 1 | 0 |
| 1 | 0 | 1 | 1 | 0 | 1 | 0 |
| 0 | 0 | 1 | 1 | 1 | 1 | 1 |
| 1 | 0 | 1 | 1 | 0 | 1 | 0 |
| 0 | 0 | 1 | 1 | 0 | 0 | 0 |
| 0 | 0 | 0 | 1 | 1 | 0 | 0 |
| 0 | 1 | 1 | 1 | 1 | 1 | 0 |
| 0 | 1 | 1 | 0 | 0 | 0 | 0 |
| 0 | 0 | 1 | 1 | 1 | 0 | 0 |
| 0 | 0 | 0 | 1 | 1 | 0 | 0 |
| 0 | 0 | 1 | 1 | 1 | 0 | 0 |

|   |   |   |   |   |   |   |
|---|---|---|---|---|---|---|
| 0 | 0 | 1 | 1 | 1 | 1 | 1 |
| 0 | 0 | 1 | 1 | 1 | 0 | 0 |
| 0 | 0 | 1 | 0 | 1 | 0 | 0 |
| 0 | 0 | 0 | 1 | 1 | 0 | 0 |
| 0 | 0 | 1 | 1 | 0 | 0 | 0 |
| 0 | 0 | 1 | 0 | 1 | 0 | 0 |
| 0 | 0 | 0 | 1 | 0 | 0 | 0 |
| 0 | 0 | 1 | 1 | 1 | 1 | 1 |
| 0 | 0 | 0 | 0 | 1 | 1 | 0 |
| 0 | 0 | 0 | 0 | 1 | 0 | 1 |
| 0 | 0 | 1 | 1 | 1 | 0 | 0 |
| 0 | 0 | 1 | 1 | 0 | 1 | 0 |
| 0 | 0 | 1 | 1 | 1 | 0 | 1 |
| 1 | 0 | 1 | 1 | 1 | 0 | 0 |
| 0 | 0 | 1 | 0 | 1 | 0 | 0 |
| 0 | 0 | 1 | 0 | 0 | 0 | 1 |
| 0 | 0 | 1 | 1 | 0 | 0 | 0 |
| 0 | 0 | 1 | 1 | 1 | 0 | 0 |
| 0 | 0 | 0 | 0 | 1 | 0 | 0 |
| 0 | 0 | 1 | 1 | 1 | 0 | 0 |
| 0 | 0 | 0 | 1 | 1 | 0 | 0 |
| 0 | 0 | 1 | 1 | 1 | 0 | 0 |
| 0 | 0 | 1 | 1 | 1 | 0 | 0 |
| 0 | 0 | 1 | 1 | 1 | 0 | 0 |
| 0 | 0 | 1 | 1 | 1 | 0 | 0 |
| 0 | 0 | 1 | 1 | 1 | 0 | 0 |
| 0 | 0 | 1 | 1 | 1 | 0 | 0 |
| 0 | 0 | 0 | 0 | 1 | 1 | 0 |
| 0 | 0 | 1 | 1 | 0 | 0 | 0 |
| 0 | 1 | 1 | 0 | 1 | 0 | 0 |
| 0 | 0 | 0 | 1 | 1 | 0 | 0 |
| 0 | 0 | 1 | 1 | 0 | 0 | 0 |
| 0 | 0 | 1 | 1 | 0 | 0 | 0 |
| 0 | 0 | 1 | 1 | 0 | 1 | 0 |
| 0 | 0 | 1 | 1 | 1 | 0 | 0 |
| 0 | 0 | 1 | 1 | 1 | 0 | 0 |
| 0 | 0 | 1 | 1 | 1 | 0 | 0 |
| 0 | 0 | 1 | 1 | 1 | 0 | 0 |
| 0 | 0 | 0 | 1 | 1 | 0 | 0 |
| 0 | 0 | 0 | 1 | 1 | 1 | 0 |
| 0 | 0 | 1 | 1 | 0 | 0 | 0 |
| 0 | 0 | 0 | 1 | 1 | 0 | 0 |
| 0 | 0 | 0 | 1 | 1 | 0 | 0 |
| 0 | 0 | 0 | 1 | 1 | 0 | 0 |
| 0 | 0 | 1 | 1 | 0 | 0 | 0 |
| 0 | 0 | 0 | 1 | 0 | 0 | 0 |
| 0 | 0 | 0 | 1 | 1 | 0 | 0 |
| 0 | 0 | 0 | 1 | 1 | 0 | 0 |
| 0 | 0 | 1 | 1 | 0 | 0 | 0 |



|   |   |   |   |   |   |   |
|---|---|---|---|---|---|---|
| 0 | 0 | 1 | 0 | 1 | 0 | 0 |
| 0 | 0 | 0 | 1 | 0 | 0 | 0 |
| 0 | 1 | 1 | 1 | 1 | 0 | 0 |
| 0 | 0 | 0 | 1 | 1 | 1 | 1 |
| 0 | 0 | 0 | 0 | 0 | 0 | 0 |
| 1 | 0 | 1 | 1 | 1 | 0 | 0 |
| 1 | 0 | 1 | 1 | 1 | 0 | 0 |
| 0 | 0 | 1 | 0 | 1 | 0 | 1 |
| 0 | 0 | 0 | 0 | 0 | 0 | 1 |
| 0 | 0 | 1 | 1 | 1 | 1 | 0 |
| 0 | 0 | 0 | 1 | 1 | 0 | 0 |
| 0 | 0 | 1 | 1 | 1 | 0 | 0 |
| 0 | 0 | 1 | 1 | 1 | 1 | 0 |
| 0 | 0 | 1 | 0 | 1 | 1 | 0 |
| 0 | 0 | 1 | 1 | 1 | 0 | 1 |
| 0 | 0 | 0 | 1 | 1 | 0 | 1 |
| 0 | 0 | 0 | 0 | 1 | 0 | 0 |
| 0 | 0 | 1 | 1 | 0 | 0 | 0 |
| 0 | 1 | 1 | 1 | 1 | 0 | 0 |
| 0 | 0 | 1 | 1 | 0 | 1 | 0 |
| 0 | 0 | 0 | 0 | 0 | 0 | 0 |
| 0 | 0 | 0 | 0 | 0 | 0 | 0 |
| 0 | 0 | 0 | 1 | 1 | 0 | 1 |
| 0 | 0 | 1 | 1 | 1 | 0 | 0 |
| 0 | 0 | 1 | 1 | 1 | 0 | 1 |
| 0 | 0 | 1 | 0 | 1 | 0 | 1 |
| 0 | 0 | 1 | 1 | 1 | 0 | 0 |
| 0 | 0 | 1 | 1 | 1 | 0 | 0 |
| 0 | 0 | 1 | 0 | 1 | 0 | 0 |
| 0 | 0 | 0 | 1 | 1 | 0 | 0 |
| 0 | 0 | 1 | 1 | 0 | 0 | 0 |
| 0 | 0 | 1 | 1 | 0 | 0 | 0 |
| 0 | 0 | 1 | 0 | 1 | 0 | 0 |
| 0 | 0 | 1 | 1 | 1 | 0 | 0 |
| 1 | 1 | 0 | 1 | 1 | 0 | 0 |
| 0 | 0 | 1 | 1 | 1 | 0 | 0 |
| 0 | 0 | 0 | 0 | 0 | 0 | 0 |

|   |   |   |   |   |   |   |
|---|---|---|---|---|---|---|
| 0 | 0 | 0 | 0 | 1 | 0 | 0 |
| 0 | 0 | 1 | 0 | 0 | 0 | 0 |
| 1 | 0 | 1 | 1 | 1 | 0 | 1 |
| 1 | 0 | 1 | 1 | 1 | 0 | 1 |
| 0 | 0 | 1 | 1 | 0 | 0 | 0 |
| 1 | 0 | 0 | 1 | 1 | 0 | 1 |
| 0 | 0 | 0 | 0 | 0 | 1 | 0 |
| 0 | 0 | 1 | 1 | 1 | 0 | 1 |
| 0 | 0 | 0 | 0 | 1 | 0 | 0 |
| 0 | 0 | 0 | 0 | 1 | 1 | 0 |
| 1 | 0 | 0 | 0 | 0 | 1 | 0 |
| 0 | 0 | 1 | 1 | 0 | 0 | 0 |
| 1 | 0 | 1 | 1 | 1 | 0 | 1 |
| 0 | 0 | 1 | 0 | 1 | 0 | 0 |
| 0 | 0 | 1 | 1 | 1 | 0 | 1 |
| 0 | 0 | 0 | 0 | 1 | 1 | 0 |
| 0 | 0 | 0 | 0 | 1 | 1 | 0 |
| 0 | 0 | 1 | 1 | 0 | 0 | 0 |
| 0 | 0 | 1 | 1 | 0 | 0 | 0 |
| 0 | 0 | 1 | 1 | 1 | 0 | 0 |
| 1 | 0 | 1 | 1 | 1 | 0 | 0 |
| 1 | 0 | 1 | 1 | 1 | 1 | 0 |
| 1 | 0 | 1 | 1 | 0 | 1 | 0 |
| 0 | 0 | 1 | 0 | 1 | 0 | 0 |
| 0 | 0 | 1 | 1 | 0 | 0 | 0 |
| 0 | 0 | 1 | 1 | 1 | 0 | 0 |
| 0 | 0 | 1 | 1 | 1 | 0 | 0 |
| 0 | 0 | 1 | 1 | 1 | 0 | 0 |
| 0 | 0 | 1 | 1 | 1 | 0 | 0 |
| 0 | 1 | 1 | 1 | 1 | 0 | 0 |
| 0 | 0 | 1 | 1 | 1 | 0 | 0 |
| 1 | 0 | 1 | 1 | 1 | 0 | 0 |
| 0 | 0 | 1 | 0 | 0 | 1 | 0 |
| 0 | 0 | 0 | 1 | 1 | 0 | 0 |
| 0 | 0 | 1 | 1 | 1 | 0 | 1 |
| 0 | 0 | 1 | 0 | 1 | 0 | 0 |
| 0 | 0 | 0 | 0 | 0 | 0 | 0 |
| 0 | 0 | 0 | 0 | 1 | 1 | 0 |
| 0 | 0 | 0 | 0 | 1 | 1 | 0 |
| 0 | 0 | 1 | 1 | 0 | 0 | 0 |

|   |   |   |   |   |   |   |
|---|---|---|---|---|---|---|
| 1 | 0 | 1 | 1 | 0 | 1 | 0 |
| 0 | 0 | 0 | 1 | 1 | 0 | 1 |
| 1 | 0 | 1 | 1 | 1 | 0 | 1 |
| 1 | 1 | 1 | 1 | 1 | 0 | 0 |
| 1 | 0 | 1 | 1 | 1 | 0 | 0 |
| 0 | 0 | 1 | 0 | 1 | 0 | 1 |
| 0 | 0 | 1 | 1 | 0 | 1 | 0 |
| 0 | 0 | 1 | 1 | 0 | 0 | 0 |
| 0 | 0 | 1 | 1 | 1 | 0 | 0 |
| 0 | 0 | 1 | 1 | 0 | 0 | 0 |
| 0 | 1 | 1 | 1 | 1 | 0 | 1 |
| 0 | 0 | 0 | 0 | 0 | 1 | 0 |
| 0 | 0 | 1 | 1 | 0 | 0 | 0 |
| 0 | 0 | 1 | 1 | 1 | 0 | 0 |
| 0 | 0 | 1 | 1 | 1 | 0 | 1 |
| 1 | 1 | 1 | 1 | 0 | 0 | 0 |
| 0 | 0 | 1 | 1 | 1 | 0 | 1 |
| 0 | 0 | 1 | 1 | 0 | 0 | 0 |
| 1 | 0 | 1 | 1 | 1 | 0 | 1 |
| 0 | 0 | 1 | 1 | 0 | 0 | 0 |
| 0 | 0 | 1 | 1 | 0 | 0 | 1 |
| 0 | 0 | 1 | 0 | 1 | 0 | 0 |
| 0 | 0 | 1 | 1 | 1 | 0 | 1 |
| 0 | 0 | 1 | 1 | 0 | 1 | 0 |
| 0 | 0 | 1 | 0 | 1 | 1 | 0 |
| 0 | 0 | 0 | 0 | 0 | 1 | 1 |
| 0 | 0 | 1 | 1 | 0 | 0 | 0 |
| 1 | 0 | 1 | 1 | 0 | 0 | 0 |
| 0 | 0 | 0 | 1 | 1 | 0 | 0 |
| 1 | 0 | 1 | 1 | 1 | 0 | 1 |
| 0 | 0 | 1 | 1 | 0 | 1 | 0 |
| 0 | 0 | 0 | 0 | 1 | 1 | 0 |
| 1 | 0 | 0 | 0 | 1 | 0 | 0 |
| 0 | 0 | 0 | 0 | 1 | 0 | 0 |
| 0 | 0 | 1 | 1 | 0 | 0 | 0 |
| 0 | 0 | 1 | 0 | 1 | 0 | 0 |
| 0 | 0 | 1 | 1 | 1 | 0 | 0 |
| 0 | 0 | 1 | 1 | 1 | 0 | 0 |
| 0 | 0 | 0 | 0 | 1 | 1 | 0 |
| 0 | 1 | 1 | 1 | 1 | 0 | 1 |

|   |   |   |   |   |   |   |
|---|---|---|---|---|---|---|
| 0 | 0 | 1 | 1 | 0 | 0 | 0 |
| 0 | 0 | 1 | 1 | 1 | 0 | 1 |
| 0 | 0 | 0 | 0 | 0 | 0 | 1 |
| 1 | 0 | 1 | 1 | 1 | 0 | 0 |
| 0 | 0 | 1 | 1 | 1 | 0 | 1 |
| 0 | 0 | 1 | 0 | 0 | 0 | 0 |
| 0 | 0 | 1 | 1 | 1 | 0 | 0 |
| 1 | 1 | 1 | 1 | 1 | 0 | 0 |
| 0 | 0 | 1 | 1 | 0 | 0 | 1 |
| 1 | 1 | 0 | 0 | 0 | 0 | 0 |
| 0 | 0 | 1 | 1 | 0 | 0 | 0 |
| 1 | 0 | 1 | 1 | 1 | 0 | 1 |
| 0 | 1 | 1 | 1 | 1 | 0 | 0 |
| 0 | 0 | 1 | 1 | 1 | 0 | 0 |
| 1 | 0 | 1 | 1 | 0 | 0 | 0 |
| 0 | 0 | 1 | 1 | 1 | 0 | 1 |
| 1 | 0 | 1 | 1 | 1 | 1 | 1 |
| 0 | 1 | 1 | 0 | 1 | 0 | 0 |
| 1 | 0 | 1 | 1 | 1 | 1 | 1 |
| 0 | 1 | 1 | 1 | 0 | 0 | 0 |
| 0 | 0 | 1 | 1 | 0 | 0 | 0 |
| 0 | 0 | 1 | 1 | 1 | 0 | 0 |
| 0 | 1 | 1 | 0 | 1 | 0 | 0 |
| 0 | 0 | 1 | 1 | 0 | 0 | 0 |
| 1 | 0 | 1 | 1 | 1 | 0 | 1 |
| 0 | 0 | 1 | 1 | 0 | 0 | 0 |
| 0 | 0 | 1 | 1 | 0 | 0 | 0 |
| 0 | 0 | 1 | 0 | 0 | 0 | 0 |
| 0 | 0 | 1 | 1 | 1 | 0 | 0 |
| 0 | 0 | 1 | 1 | 1 | 0 | 1 |
| 0 | 0 | 0 | 0 | 0 | 0 | 1 |
| 0 | 0 | 1 | 1 | 0 | 0 | 1 |
| 1 | 0 | 1 | 1 | 0 | 0 | 0 |
| 1 | 1 | 1 | 1 | 1 | 0 | 1 |
| 1 | 0 | 1 | 1 | 1 | 0 | 0 |
| 0 | 0 | 1 | 1 | 1 | 0 | 0 |
| 0 | 0 | 1 | 0 | 1 | 0 | 0 |
| 1 | 0 | 1 | 1 | 0 | 0 | 0 |
| 0 | 0 | 1 | 1 | 0 | 0 | 0 |

| Metformin | GLP1-RA | Insulin |
|-----------|---------|---------|
|-----------|---------|---------|

|   |   |   |
|---|---|---|
| 0 | 0 | 0 |
| 0 | 0 | 0 |
| 0 | 0 | 0 |
| 0 | 0 | 0 |
| 0 | 1 | 1 |
| 0 | 0 | 0 |
| 0 | 0 | 0 |
| 1 | 0 | 0 |
| 0 | 0 | 0 |
| 1 | 0 | 0 |
| 1 | 1 | 0 |
| 0 | 0 | 0 |
| 1 | 1 | 0 |
| 0 | 0 | 0 |
| 0 | 0 | 0 |
| 1 | 0 | 0 |
| 0 | 0 | 0 |
| 1 | 0 | 0 |
| 0 | 0 | 0 |
| 0 | 0 | 0 |
| 0 | 0 | 0 |
| 0 | 0 | 1 |
| 0 | 0 | 0 |
| 0 | 1 | 0 |
| 1 | 0 | 1 |
| 1 | 0 | 0 |
| 0 | 0 | 0 |
| 1 | 1 | 0 |
| 0 | 0 | 0 |
| 0 | 1 | 0 |
| 0 | 0 | 0 |
| 1 | 0 | 0 |
| 0 | 0 | 0 |
| 1 | 0 | 0 |
| 1 | 0 | 0 |
| 1 | 0 | 0 |
| 0 | 0 | 0 |

|   |   |   |
|---|---|---|
| 1 | 0 | 0 |
| 1 | 0 | 0 |
| 0 | 0 | 0 |
| 1 | 0 | 0 |
| 1 | 1 | 1 |
| 1 | 0 | 0 |
| 0 | 0 | 0 |
| 1 | 0 | 0 |
| 1 | 1 | 0 |
| 1 | 0 | 0 |
| 0 | 0 | 0 |
| 0 | 0 | 0 |
| 1 | 0 | 0 |
| 1 | 0 | 0 |
| 0 | 0 | 0 |
| 0 | 0 | 0 |
| 0 | 0 | 0 |
| 1 | 0 | 0 |
| 0 | 0 | 1 |
| 1 | 0 | 1 |
| 0 | 0 | 0 |
| 0 | 0 | 0 |
| 1 | 1 | 0 |
| 0 | 0 | 0 |
| 0 | 0 | 0 |
| 0 | 1 | 1 |
| 1 | 1 | 1 |
| 0 | 0 | 0 |
| 1 | 1 | 0 |
| 0 | 0 | 0 |
| 1 | 1 | 0 |
| 0 | 0 | 1 |
| 1 | 1 | 1 |
| 1 | 0 | 0 |
| 1 | 1 | 0 |
| 0 | 0 | 0 |

|   |   |   |
|---|---|---|
| 1 | 0 | 0 |
| 0 | 0 | 0 |
| 1 | 0 | 0 |
| 0 | 0 | 0 |
| 0 | 0 | 0 |
| 0 | 0 | 0 |
| 0 | 0 | 0 |
| 1 | 0 | 0 |
| 0 | 0 | 0 |
| 1 | 0 | 1 |
| 0 | 0 | 0 |
| 0 | 0 | 0 |
| 1 | 0 | 0 |
| 1 | 0 | 1 |
| 0 | 0 | 0 |
| 1 | 0 | 0 |
| 0 | 0 | 1 |
| 0 | 0 | 0 |
| 1 | 0 | 0 |
| 1 | 0 | 0 |
| 0 | 0 | 0 |
| 0 | 0 | 0 |
| 1 | 0 | 0 |
| 1 | 0 | 0 |
| 0 | 0 | 1 |
| 0 | 0 | 1 |
| 0 | 1 | 0 |
| 0 | 0 | 0 |
| 1 | 0 | 0 |
| 1 | 0 | 0 |
| 0 | 0 | 0 |
| 0 | 0 | 0 |
| 0 | 0 | 0 |
| 0 | 0 | 0 |
| 0 | 0 | 0 |
| 0 | 0 | 0 |
| 1 | 1 | 0 |





|   |   |   |
|---|---|---|
| 0 | 0 | 0 |
| 0 | 1 | 1 |
| 1 | 0 | 0 |
| 1 | 0 | 0 |
| 0 | 0 | 0 |
| 1 | 0 | 0 |
| 0 | 0 | 0 |
| 0 | 0 | 0 |
| 0 | 0 | 0 |
| 0 | 0 | 0 |
| 0 | 0 | 1 |
| 0 | 0 | 0 |
| 0 | 0 | 0 |
| 1 | 0 | 0 |
| 0 | 0 | 0 |
| 0 | 0 | 0 |
| 1 | 0 | 0 |
| 0 | 0 | 0 |
| 1 | 1 | 0 |
| 1 | 0 | 0 |
| 1 | 0 | 1 |
| 0 | 0 | 1 |
| 0 | 1 | 1 |
| 0 | 0 | 0 |
| 0 | 0 | 0 |
| 0 | 0 | 0 |
| 0 | 0 | 0 |
| 1 | 1 | 0 |
| 1 | 0 | 1 |
| 0 | 0 | 0 |
| 0 | 0 | 0 |
| 1 | 1 | 0 |
| 0 | 0 | 0 |
| 1 | 0 | 0 |
| 1 | 0 | 1 |
| 0 | 0 | 0 |
| 0 | 0 | 0 |
| 0 | 0 | 0 |

|   |   |   |
|---|---|---|
| 0 | 1 | 0 |
| 0 | 0 | 0 |
| 0 | 0 | 0 |
| 0 | 0 | 0 |
| 0 | 0 | 0 |
| 1 | 0 | 0 |
| 0 | 0 | 0 |
| 0 | 0 | 1 |
| 1 | 0 | 0 |
| 0 | 0 | 1 |
| 0 | 0 | 0 |
| 0 | 0 | 1 |
| 0 | 0 | 0 |
| 0 | 0 | 0 |
| 1 | 0 | 1 |
| 0 | 0 | 0 |
| 1 | 0 | 1 |
| 1 | 0 | 0 |
| 0 | 0 | 1 |
| 1 | 1 | 0 |
| 0 | 0 | 0 |
| 1 | 0 | 0 |
| 1 | 1 | 1 |
| 1 | 0 | 0 |
| 0 | 0 | 0 |
| 0 | 0 | 0 |
| 1 | 1 | 1 |
| 0 | 0 | 0 |
| 1 | 0 | 0 |
| 0 | 1 | 1 |
| 0 | 0 | 0 |
| 0 | 0 | 1 |
| 1 | 1 | 0 |
| 0 | 0 | 1 |
| 0 | 0 | 0 |
| 0 | 0 | 1 |
| 1 | 0 | 0 |
| 0 | 0 | 0 |

|   |   |   |
|---|---|---|
| 0 | 1 | 0 |
| 1 | 0 | 0 |
| 1 | 1 | 0 |
| 0 | 0 | 1 |
| 0 | 0 | 0 |
| 0 | 0 | 0 |
| 0 | 0 | 0 |
| 0 | 0 | 0 |
| 0 | 1 | 0 |
| 0 | 0 | 1 |
| 0 | 0 | 1 |
| 0 | 0 | 0 |
| 0 | 0 | 0 |
| 1 | 0 | 0 |
| 0 | 0 | 1 |
| 0 | 1 | 0 |
| 1 | 0 | 0 |
| 0 | 0 | 0 |
| 0 | 0 | 0 |
| 0 | 0 | 1 |
| 1 | 0 | 0 |
| 1 | 0 | 0 |
| 0 | 1 | 1 |
| 1 | 0 | 0 |
| 0 | 1 | 1 |
| 0 | 0 | 0 |
| 0 | 1 | 1 |
| 0 | 0 | 1 |
| 1 | 0 | 0 |
| 1 | 1 | 0 |
| 1 | 1 | 0 |
| 0 | 0 | 1 |
| 0 | 0 | 0 |
| 0 | 0 | 1 |
| 0 | 0 | 0 |
| 0 | 0 | 0 |
| 0 | 0 | 0 |
| 0 | 0 | 0 |
| 0 | 1 | 1 |
